1

1 TITLE

2 Separate the wheat from the chaff: genomic analysis of local adaptation in the red coral

3 *Corallium rubrum*

4

5 AUTHORS

6 Pratlong M.<sup>1,2•</sup>, Haguenaer A.<sup>1</sup>, Brener K.<sup>3</sup>, Mitta G.<sup>3</sup>, Toulza E.<sup>3</sup>, Garrabou J.<sup>4,5</sup>, Bensoussan

7 N.<sup>6</sup>, Pontarotti P.<sup>2,7\*</sup> & Aurelle D.<sup>1,5\*•</sup>

8

9 AFFILIATIONS

10 1. Aix Marseille Univ, Avignon Université, CNRS, IRD, IMBE, Marseille, France

11 2. Aix Marseille Univ, CNRS, Centrale Marseille, I2M, Marseille, France, Equipe Evolution

12 Biologique et Modélisation, Marseille, France

13 3. Perpignan Via Domitia Univ., IHPE UMR 5244, CNRS, IFREMER, Montpellier Univ.,

14 Perpignan, France

15 4. Institute of Marine Sciences (ICM-CSIC), Barcelona, 08003, Spain

16 5. Aix Marseille Univ, Université de Toulon, CNRS, IRD, MIO, Marseille, France

17 6. IPSO FACTO, SCOPArI, Pole Océanologie, Marseille, 13001, France

18 7. Aix Marseille Univ, IRD, APHM, MEPHI, IHU Méditerranée Infection, Marseille France

19 Evolutionary Biology team.

20

21 \* These authors jointly supervised this work.

22 • Corresponding authors: [marine.pratlong@gmail.com](mailto:marine.pratlong@gmail.com) / [didier.aurelle@univ-amu.fr](mailto:didier.aurelle@univ-amu.fr)

2 1

3

## 23 ABSTRACT

24 Genomic data allow an in-depth and renewed study of local adaptation. The red coral  
25 (*Corallium rubrum*, Cnidaria) is a highly genetically structured species and a promising  
26 model for the study of adaptive processes along an environmental gradient. Here, we used  
27 RAD-Sequencing in order to study the vertical genetic structure of this species and to search  
28 for signals of local adaptation to depth and thermal regime in the red coral. Previous studies  
29 have shown different thermotolerance levels according to depth in this species which could  
30 correspond to genetic or environmental differences. We designed a sampling scheme with six  
31 pairs of 'shallow vs deep' populations distributed in three geographical regions as replicates.  
32 Our results showed significant differentiation among locations and among sites separated by  
33 around 20 m depth. The tests of association between genetics and environment allowed the  
34 identification of candidate loci under selection but with a potentially high rate of false  
35 positive. We discuss the methodological obstacles and biases encountered for the detection of  
36 selected loci in such a strongly genetically structured species. On this basis, we discuss the  
37 significance of the candidate loci for local adaptation detected in each geographical region  
38 and the evolution of red coral populations along environmental gradients.

39

40

## 41 INTRODUCTION

42 The study of the mechanisms of adaptation of species to their local environment is of great  
43 interest in evolutionary biology. The interaction between between environmental conditions,  
44 biological traits and evolutionary factors (selection, drift, migration and mutation) will shape

4 2

5

45 the relative importance of genetic and plastic responses for each species facing heterogeneous  
46 environmental conditions. If selection is predominant, and if the environmental gradient is  
47 persistent for an extended period of time, each local population exposed to local selection  
48 could become genetically adapted to the corresponding local environment (Kawecki and  
49 Ebert, 2004; Gagnaire and Gaggiotti, 2016). An organism can also cope with local  
50 environmental conditions via plasticity or acclimatization, whereby a given genotype  
51 develops during its lifetime morphological or physiological responses (DeWitt *et al.*, 1998;  
52 Pigliucci, 2001). Although particular situations favoring local adaptation or acclimatization  
53 are documented, it is often difficult to disentangle the effects of these two mechanisms and  
54 establish their relative contributions to adaptability (Palumbi *et al.*, 2014). In addition,  
55 understanding these mechanisms has a fundamental interest in the current context of climate  
56 change for improving predictive models and proposing management strategies (Mumby *et al.*,  
57 2011; Gagnaire and Gaggiotti, 2016).

58 Apart from natural selection, gene flow is a key factor in the evolution of adaptive processes.  
59 It can hinder local adaptation through the input in a population of potentially maladapted  
60 individuals (migration load; Lenormand, 2002). Conversely, several theoretical studies have  
61 shown that gene flow can counteract the effects of genetic drift and promote local adaptation  
62 (Hastings and Rohlf, 1974; Felsenstein, 1975; Slatkin and Maruyama, 1975; Nagylaki, 1978;  
63 Alleaume-Benharira *et al.*, 2006). The use of high throughput sequencing renewed the study  
64 of local adaptation. Various *bottom – up* approaches are now available to study local  
65 adaptation through the identification signals of selection along the genome (Barrett and  
66 Hoekstra, 2011). In the marine realm, such studies have been conducted at very large scale on

6 3

7

67 highly dispersive teleost species (Bradbury *et al.*, 2010; Limborg *et al.*, 2012; Wang *et al.*,  
68 2013; Milano *et al.*, 2014; Bernardi *et al.*, 2016; Guo *et al.*, 2016), and on benthic  
69 invertebrates with a highly dispersive, planctonic larvae stage (Chu *et al.*, 2014; Bay and  
70 Palumbi, 2014; Araneda *et al.*, 2016; Benestan *et al.*, 2016). Marine species with high genetic  
71 structure are less frequent than more dispersive ones, and genomic studies of local adaptation  
72 in such species are still scarce (see Bongaerts *et al.*, 2017 for a recent example). The study of  
73 local adaptation in a context of high genetic structure may also be difficult from a  
74 methodological point of view: high average  $F_{ST}$  values can lead to a high number of false  
75 positives in outlier tests for the detection of selection by the corresponding increase in the  
76 variance of  $F_{ST}$  values (Bierne *et al.*, 2013; Hoban *et al.*, 2016). Furthermore, in a context of  
77 high average genomic differentiation, it could be difficult to identify selected loci with a  
78 higher differentiation than expected under the neutral model. Finally, if genetic drift is strong,  
79 it can generate outlier loci with apparent correlation with an environmental variable outside  
80 any selective effect (Kawecki and Ebert, 2004; Hofer *et al.*, 2009; Coop *et al.*, 2010).  
81 Therefore the empirical study of local adaptation in such situation remains often challenging  
82 and with few empirical data in the marine realm.

83 Marine coastal environments offer particularly interesting conditions for studies of local  
84 adaptation, because of the gradual changes in environmental conditions along coastline at  
85 small scale, the more or less gradual vertical changes from shallow to deep water and the  
86 patchy distribution of contrasted habitats at different scales (Sanford and Kelly, 2011;  
87 Lundgren *et al.*, 2013; Wrange *et al.*, 2014). This interest, promoted studies of local  
88 adaptation in coastal ecosystems (Ayre, 1995; Ulstrup and Van Oppen, 2003; Smith *et al.*,

8 4

9

89 2007; Sherman and Ayre, 2008; Barshis *et al.*, 2010; Bongaerts *et al.*, 2011; Barshis *et al.*,  
90 2013; Lundgren *et al.*, 2013; Kersting *et al.*, 2013; Haguenaer *et al.*, 2013; Ziegler *et al.*,  
91 2014; Palumbi *et al.*, 2014; Bay and Palumbi, 2014; Ledoux *et al.*, 2015; Pivotto *et al.*, 2015;  
92 Jin *et al.*, 2016; Bongaerts *et al.*, 2017). Studying the genetic basis of local adaptation and the  
93 connectivity between habitats, could also give some information on the response to climate  
94 change (e.g. Bongaerts *et al.*, 2017). In this context genome scans are powerful approaches to  
95 explore adaptive processes in natural populations (Manel *et al.*, 2016).

96 The red coral (*Corallium rubrum*) is an asymbiotic (without *Symbiodinium*) temperate  
97 octocoral distributed from 5 to 1016 m depth in the Mediterranean sea and the near Atlantic  
98 (Boavida *et al.*, 2016; Knittweis *et al.*, 2016). It is a sessile and long-living species (more than  
99 100 years), with low growth and recruitments rates (Marschal *et al.*, 2004; Santangelo *et al.*,  
100 2012). The study of a few microsatellite loci has demonstrated a strong genetic structure in  
101 this species (Ledoux *et al.*, 2010a; Ledoux, *et al.*, 2010b). The shallowest populations, above  
102 the seasonal thermocline, are exposed to high maximum temperatures and to frequent and  
103 intense thermal fluctuations in summer (Haguenaer *et al.*, 2013). The intensity and frequency  
104 of extreme thermal events decrease with depth, and the deepest populations are exposed to  
105 stable thermal regimes. Since the observation of mass mortality events affecting this species  
106 during thermal anomalies in 1999 and 2003, the thermotolerance of the red coral has been  
107 intensively studied in the region of Marseille (France; Garrabou *et al.*, 2001, 2009). Common  
108 garden experiments highlighted differences in polyp activities, calcification rate, necrosis rate  
109 and expression of HSP70 between shallow and deep individuals (10 or 20 m compared to 40  
110 m depth) facing thermal stress (Torrents *et al.*, 2008 ; Ledoux *et al.* 2015; Haguenaer *et al.*,

11

111 2013). Transcriptomes of individuals from 5 and 40 m were compared and several genes were  
112 detected as differentially expressed without the application of any stress (Pratlong *et al.*,  
113 2015). These results suggested the possibility of local adaptation to depth in this species, but  
114 the possibility of environmental effects could not be excluded.

115 Together, these studies highlighted phenotypic differences in thermotolerance levels between  
116 individuals from different depths in Marseille, with shallower individuals more tolerant than  
117 deeper ones. Nevertheless we still do not know if these differences are the result of local  
118 adaptation or of individual acclimatization, or both. Previous works on this species enabled us  
119 to have a precise idea of the geographic scale at which local adaptation may occur, and were  
120 useful to optimize our sampling design. Because populations from different regions may have  
121 evolved similar responses to thermal stress, through similar or different genetic basis, it is  
122 interesting to investigate local adaptation in pairs of 'shallow vs deep' populations exposed to  
123 contrasted thermal regimes in distinct geographical regions (Jones *et al.*, 2012; Hoban *et al.*,  
124 2016). Finally, the study of the genetic structure of this species would be useful to better  
125 understand the potential role of deeper populations in reseeding shallower ones following  
126 disturbances (Bongaerts *et al.*, 2017).

127 Here we applied Restriction site Associated DNA sequencing (RAD-Seq) to individuals from  
128 pairs of 'shallow vs. deep' populations in three geographical regions of the Mediterranean Sea.  
129 The goal of this study was to characterize the neutral and adaptive genomic variation in this  
130 species and to test the possibility of local adaptation to depth through a genome scan  
131 approach. Our results enable us to discuss the neutral genetic structure of the red coral. Then  
132 we highlight the methodological obstacles expected in the detection of local adaptation in this

12 6

13

133 context. Finally, we discuss the robustness of the candidates of local adaptation detected in  
134 each geographical region.

135

## 136 MATERIAL AND METHODS

### 137 *Sampling and DNA extraction*

138 *Corallium rubrum* colonies were collected by scuba diving at two depths of two sites in three  
139 geographical regions (Marseille, Banyuls, Corsica) between February and August 2013  
140 (Fig. S1, Table 1). Red coral populations from these three regions correspond to different  
141 genetic clusters according to microsatellites (Ledoux *et al.*, 2010b) and RAD-Seq (see  
142 results). The two depths of each site presented contrasted thermal regimes with higher mean,  
143 maximum and standard deviation of temperature at shallower depths (surveys from March  
144 2012 to October 2014; Table 2). Samples from the two depths at each site will be referred as  
145 shallow and deep. The three geographical regions presented different annual variations of  
146 temperatures between the two studied depths: a difference of 3.8 °C between the maximum  
147 observed at the two depths in Marseille, 1.7 °C in Corsica and 0.5 °C in Banyuls (Table 2).  
148 Thirty individuals per site and depth were collected (total 360 individuals), preserved in 95 %  
149 ethanol and stored at -20 °C until DNA extraction. Total genomic DNA was extracted  
150 according to the protocol of Sambrook *et al.* (1989), followed by a purification using Qiagen  
151 DNeasy blood and tissue spin columns (Qiagen). Genomic DNA concentration was quantified  
152 using a Qubit 2.0 Fluorometer (Life Technologies).

153

### 154 *RAD-Sequencing*

14 7

15

155 Twelve RAD libraries were prepared according to the protocol described in Etter *et al.* (2011),  
156 with small modifications. Briefly, 1 µg of genomic DNA for each sample was digested using  
157 high-fidelity PstI during 60 min at 37 °C. P1 adapters, with 4-6 bp individual barcodes were  
158 then ligated to each sample using 0.5 µL of T4 DNA ligase (NEB), 0.5 µL of rATP 100 mM  
159 (Promega), 1 µL of DTT 500 mM (Promega), 1 µL of 10X T4 ligase buffer (NEB) and  
160 incubated during 60 min at 22 °C, 10 min at 65 °C and 1 min at 64 °C. Individual samples  
161 were pooled by 32 (generally by location), sheared, size selected and P2-barcoded. Final PCR  
162 for RAD-tags enrichment were performed with 16 cycles and primers dimers were removed  
163 during a final AMPure Beads Purification (Agencourt). Libraries were sequenced on an  
164 Illumina HiSeq2000 using 100 bp single-end reads, at the Biology Institute of Lille (IBL,  
165 UMR 8199 CNRS) and at the MGX sequencing platform in Montpellier (France).

166 The STACKS pipeline (Catchen *et al.*, 2011, 2013) was used for the loci *de novo* assembly  
167 and genotyping. Quality filtering and demultiplexing were performed with the  
168 *process\_radtags* module with default parameters which enables to remove any read with  
169 uncalled base and to perform a phred-33 quality filtering of raw reads. Exact-matching RAD  
170 loci (putative orthologous tags) were individually assembled using *ustacks* with a minimum  
171 depth of coverage of five reads per allele ( $m = 5$ ) and a maximum of five nucleotide  
172 mismatches between allele ( $M = 5$ ). These parameters were optimized during preliminary  
173 runs. *Cstacks* was used to build a catalog of consensus loci from all individuals, with five  
174 mismatches allowed between individuals at the same locus ( $n = 5$ ). Matches of individual  
175 RAD loci to the catalog of loci were searched using *sstacks*. Finally, the *population* module  
176 was used to obtain the loci that were successfully genotyped in at least 75 % of individuals

16 8



17

177 from all populations. We observed an increase in the number of SNPs from position 86 bp to  
178 91 bp and we removed these positions from the analysis which were due to sequencing  
179 problems. In order to filter for poor-quality SNPs and artifacts due paralogous sequences, we  
180 used VCFtools (Danecek *et al.*, 2011) to remove SNPs that were not at the Hardy-Weinberg  
181 equilibrium within at least one of the 12 populations with a p-value threshold of 0.01. SNPs  
182 with a minor allele frequencies below 0.01 were removed using VCFTools. Individuals with  
183 more than 30 % of missing genotypes were discarded. Finally, only the first SNP of each  
184 RAD locus was kept for further analysis. The whole dataset has been previously used for the  
185 study of sex determinism in *C. rubrum* (Pratlong *et al.*, 2017); we develop here the study of  
186 genetic structure and local adaptation.

187

#### 188 *Diversity and neutral genetic structure*

189 Global  $F_{IS}$  over alleles and gene diversity were estimated using GENEPOP and ARLEQUIN  
190 v.3.5 (Rousset, 2008; Excoffier and Lischer, 2010). The *C. rubrum* genetic structure was first  
191 analyzed by principal component analysis (PCA) using the package adegenet in R (Jombart,  
192 2008; R Core Team, 2016). This analysis was performed on the total dataset (12 populations)  
193 and inside each of the three studied geographical regions (four populations in each). The  
194 dataset was centered and missing data were replaced by the mean allele frequency for each  
195 locus (<http://adegenet.r-forge.r-project.org/files/tutorial-basics.pdf>). In a second step, we  
196 performed a Bayesian population clustering implemented in the program STRUCTURE  
197 v.2.3.4 (Pritchard *et al.*, 2000; Falush *et al.*, 2003, 2007; Hubisz *et al.*, 2009). We performed  
198 ten independent replicates from  $K = 1$  to 10 with a burn-in of 50 000 and a number of MCMC

18 9

19

199 iterations after burn-in of 100 000, with the model allowing for admixture and correlated  
200 allele frequencies. We calculated the  $\Delta K$  statistic of Evanno *et al.* (2005) to help in the choice  
201 of the most appropriate number of genetic clusters but we also considered different K values.  
202 We used CLUMPAK to summarize the STRUCTURE results from the ten independent runs  
203 (Kopelman *et al.*, 2015). The global and pairwise populations  $F_{ST}$  and exact tests for  
204 population differentiation were computed with GENEPOP 4.0.10 (Rousset, 2008). The  
205 correlation between the spatial distance between the two depths of the same site and the  
206 corresponding population pairwise  $F_{ST}$  was tested with the correlation test of Spearman  
207 implemented in R (R Core Team, 2016). Finally, we conducted an analysis of molecular  
208 variance (AMOVA) in ARLEQUIN v.3.5 (Excoffier and Lischer, 2010) with 10 000  
209 permutations. The hierarchy for this analysis was chosen to follow the three geographical  
210 regions of our samples (Marseille, Corsica and Banyuls). This choice was justified by the  
211 PCA on the overall dataset. Finally, we performed the PCA and  $F_{ST}$  calculation using a dataset  
212 comprising only putatively neutral SNPs (without the SNPs detected as outliers by  $F_{ST}$  outlier  
213 methods, see below).

214

#### 215 *Detection of local adaptation*

216 In order to search for loci potentially involved in local adaptation, we first used BayeScEnv  
217 (Villemereuil and Gaggiotti, 2015). This method identifies  $F_{ST}$  outlier loci that show a  
218 relationship between genetic differentiation and environmental differentiation. Runs were  
219 performed using default parameters, except the number of pilot runs that was set at 40. The  
220 maximal temperature recorded in each site was used as environmental variable (Table 2). We

20 10

21

221 tested other descriptors of the thermal regime and we got similar results (data not shown). The  
222 convergence of runs was checked with the Gelman and Rubin's diagnostic using the R  
223 package coda (Plummer *et al.*, 2006).

224 Second, we searched for  $F_{ST}$  outliers among red coral populations using ARLEQUIN v.3.5  
225 (Hofer *et al.*, 2009; Excoffier and Lischer, 2010). Because hierarchical genetic structures are  
226 known to lead to a high number of false positives in the search of outlier loci (Hofer *et al.*,  
227 2009), we performed this analysis independently in the three geographical regions in order to  
228 down a level in the structure. With this method, a distribution of  $F_{ST}$  across loci as a function  
229 of heterozygosity between populations is obtained by performing simulations under a  
230 hierarchical island model (two depths in one site and two sites in one geographical region).  
231 Outliers were identified as loci being in the tails of the generated distribution ( $p < 0.01$ ).  
232 Outliers detected by ARLEQUIN could be false positives or the result of a selective pressure  
233 independent of depth. Therefore, we selected among these candidate loci, those linked with  
234 depth differentiation by searching, inside each geographical regions, loci with significant  
235 differences in genotypic frequencies between depths according to a  $\chi^2$  test ( $p < 0.01$ ). We  
236 corrected the obtained p-values using a false discovery rate of 0.05 (Benjamini and Hochberg,  
237 1995).

238 Finally, we used the R package pcadapt to search for outliers loci by taking into account  
239 population structure and individual admixture (Luu *et al.*, 2017). This method is  
240 recommended in cases of hierarchical genetic structure for a better control of the false  
241 positive rate. By identifying outliers loci linked with a particular principal component,  
242 pcadapt enabled us to focus on candidates linked with our biological question. From the

22 11

23

243 pcadapt analyses, we selected outliers candidates linked with the relevant principal  
244 components with a q-value cutoff of 0.01.

245

#### 246 *Functional annotation and enrichment tests*

247 The RAD tags were aligned on the red coral transcriptome (Pratlong *et al.*, 2015) using the  
248 Burrows-Wheeler Alignment Tool (BWA; Li and Durbin, 2009). Blast2GO was used for the  
249 annotation of resulting contigs and functional enrichment analysis (Conesa *et al.*, 2005). First,  
250 a blastp was first performed on the NCBI nr database with an e-value threshold of  $10^{-10}$   
251 (Altschul *et al.*, 1990). Then, Blast2GO retrieved Gene Ontology (GO) terms associated with  
252 the obtained BLAST hits. Finally, in order to identify function potentially over-represented in  
253 outliers, we performed an enrichment analysis using a Fisher's exact test corrected using a  
254 false discovery rate of 0.05 (Benjamini and Hochberg, 1995).

255

## 256 RESULTS

### 257 *RAD-Sequencing and genotyping*

258 An average of  $191 \pm 21$  millions of reads by library was obtained after sequencing. After the  
259 demultiplexing and cleaning processes of the STACKS's *process\_radtags* module, an average  
260 of  $180 \pm 22$  millions of reads by library was obtained. From these reads, we were able to  
261 assemble 138 810 unique consensus RAD-tags present in at least 75 % of our 360  
262 individuals. After all quality filter steps (Table 3), 27 461 SNPs were available. Finally, we  
263 removed six individuals presenting more than 30 % of missing data (one individual from the  
264 MEJ40 population, two from the BANN40 population, two from the GAL20 population and

24 12

25

265 one from the GAL40 population). Our final dataset used for further analysis consisted in 359  
266 individuals genotyped on 27 461 SNPs.

267

#### 268 *Genetic diversity*

269 Multilocus values of the  $F_{IS}$  ranged between 0.005 (ELV12) and 0.065 (BANS40) (Table 4).

270 Gene diversity varied from 0.12 (GAL20) to 0.18 (all populations of Marseille) (Table 4).

271 Populations of Marseille had higher values of expected heterozygosity than populations from

272 Corsica and Banyuls ( $p = 0.02$ , Wilcoxon–Mann–Whitney test).

273

#### 274 *Population structure analysis*

275 The positioning of individuals with respect to the first two principal components reflected the

276 geographical and depth origin of the individuals (Fig. 1A). Individuals from Marseille and

277 from Banyuls formed two clear and homogeneous groups while individuals from the two sites

278 of Corsica formed two different groups with an important distance between them on the

279 second axis. The first PCA axis explained 7.28 % of the total genotypic variance and

280 separated individuals from Marseille from individuals from Banyuls and Corsica. The second

281 axis explained 4.4 % of the total genetic variance and separated individuals from the Porto

282 site in Corsica from other individuals. The fifth axis of the PCA separated all individuals

283 according to their sex, independently from their geographical origin (Pratlong et al., 2017).

284 Concerning PCA inside geographical regions, individuals from the two sites of Corsica and

285 Marseille (north and south) were separated along the first axis (13.41 % and 6.74 % of the

286 total genetic variance respectively; Fig. 1B and 1C). The second axis (2.77 % of the total

27

287 genetic variance) separated populations from the two depths of the two sites of Marseille. In  
288 Corsica and Banyuls, no PCA axis showed clear association with depth. Individuals from the  
289 two depths of the Galeria (GAL) site of Corsica were separated along the second axis (4.02 %  
290 of the total genetic variance) but this was not the case for individuals from the two depths of  
291 the Porto site (POR). Individuals from Banyuls showed much less structure than individuals  
292 from Marseille and Corsica (Fig. 1D). The first axis (2.99 % of the total genetic variance)  
293 separated individuals from the two sites (north and south). The second axis (2.46 % of the  
294 total genetic variance) separated individuals according to their sex (Pratlong *et al.*, 2017). The  
295 PCA on the overall dataset and inside each geographical region gave similar results when only  
296 putatively neutral SNPs were considered (Fig. S2).

297 The delta(K) criterion (Evanno *et al.*, 2005) indicated  $K = 2$  as the most informative number  
298 of clusters for the STRUCTURE analysis. We present here the results for  $K = 2$  to  $K = 4$  which  
299 captured the main information of the results (Fig. 2). In all cases, all clusters corresponded to  
300 the main geographical boundaries and the two depths of each site always clustered together.  
301 For  $K = 2$ , a clear separation between the Marseille regions and the Corsica / Banyuls regions  
302 was observed, confirming the separation of populations along the first PCA axis (Fig. 1). The  
303 clustering at  $K = 3$  separated the three geographical regions in 7/10 replicates, and the  
304 remaining replicates grouped either one or the other Corsican sites with Banyuls populations  
305 (Fig. S3). Finally,  $K = 4$  separated the two Corsican sites.

306 The overall multilocus  $F_{ST}$  of the total dataset was 0.13. Pairwise  $F_{ST}$  values ranged from 0.01  
307 (BANS20 vs BANS40, BANS20 vs BANN40 and BANN40 vs BANS40) to 0.24 (ELV12 vs  
308 GAL20 and FIG8 vs GAL20; Table 5). The exact test of genetic differentiation was highly

29

309 significant for all pairwise comparisons ( $p < 0.001$ ), even for populations separated by 10 m  
310 ( $F_{ST} = 0.022$  for BANN20 vs BANN40,  $F_{ST} = 0.012$  for BANS20 vs BANS40 and  $F_{ST} = 0.10$   
311 for GAL20 vs GAL40). Considering the  $F_{ST}$  between depths, high  $F_{ST}$  values can be observed  
312 for different loci and different samples comparisons (Fig. S4). The average  $F_{ST}$  between the  
313 two depths of the same site was 0.04 in Marseille, 0.08 in Corsica and 0.02 in Banyuls (0.04  
314 for the total dataset). Considering only putatively neutral loci (see below for outliers loci), the  
315 overall  $F_{ST}$  of the total dataset was 0.12 and pairwise  $F_{ST}$  values ranged from 0.01 (BANS20  
316 vs BANS40, BANS20 vs BANN40 and BANN40 vs BANS40) to 0.23 (ELV12 vs GAL20)  
317 (Table S1). There was no correlation between the distance between two depths of the same  
318 site and the corresponding population pairwise  $F_{ST}$  ( $p = 0.75$ ). We obtained a similar result  
319 ( $p = 1$ ) if we removed the four populations of Marseille whose sampling sites for the two  
320 considered depths were not exactly the same (653 m horizontal distance between FIG8 and  
321 MOR40 and 995 m between ELV12 and MEJ40). Finally, the  $F_{ST}$  between the two shallow  
322 sites inside a geographical region was in all three cases higher than those between the two  
323 deep sites of the same region (0.10 vs 0.058 in Marseille, 0.20 vs 0.14 in Corsica and 0.025 vs  
324 0.014 in Banyuls,  $p < 1.10^{-16}$  with a t-test in all three comparisons). In a similar way, the  $F_{ST}$   
325 between two shallow sites of two different geographical regions were in all cases higher than  
326 those between the two corresponding deep sites, except for the comparisons between the  
327 Porto sites and the Banyuls sites ( $p = 0.38$  and  $p = 0.02$  for the POR/BANN and POR/BANS  
328 comparisons respectively;  $p < 1.10^{-16}$  for the other comparisons).

329 The AMOVA indicated a similar percentage of the molecular variance explicated by  
330 differences among group and within groups (7.8 and 7.07 % respectively) and approximately

30 15

31

331 85 % of variance explicated by differences within populations (Table 6). There was significant  
332 genetic differentiation at the three studied levels ( $F_{ST} = 0.15$ ,  $F_{SC} = 0.08$ ,  $F_{CT} = 0.08$  ;  $p < 0.001$   
333 in the three cases).

334

### 335 *Outliers SNPs*

336 We identified 82 outliers with BayeScEnv. However, we noticed that all these outliers seemed  
337 to be driven by the divergence between particular populations, with one allele being always  
338 fixed in one or several populations without logical association with depth. ARLEQUIN  
339 detected 563 loci potentially under selection in Marseille, 869 in Corsica and 397 in Banyuls.  
340 Among these SNPs, all corresponded to a signal of divergent selection in Marseille and  
341 Banyuls, 207 of the 869 candidate loci corresponded to a signal of balanced selection in  
342 Corsica and the remaining 662 loci corresponded to a signal of divergent selection.  
343 Considering only these outliers, the overall  $F_{ST}$  of the total dataset was 0.25 and pairwise  $F_{ST}$   
344 values ranged from 0.02 (BANS20 vs BANS40) to 0.42 (GAL20 vs POR40) (Table S2). The  
345 207 loci potentially under balanced selection in Corsica were linked with sex differentiation  
346 and were not further analyzed here (Pratlong *et al.* 2017). Eight outlier SNPs were detected  
347 both in Marseille and Banyuls, 12 both in Marseille and Corsica and 12 both in Corsica and  
348 Banyuls. No SNP was detected as potentially under divergent selection and common in the  
349 three regions. The complementary  $\chi^2$  test of homogeneity of genotypic frequencies  
350 between depths inside each region detected 162 candidate loci in Marseille, 1 371 in Corsica  
351 and 3 in Banyuls. Among these loci, 35, 248 and 2 were also respectively detected with the  
352 ARLEQUIN analysis. The numbers of outlier loci were correlated with the variance and the

32 16



33

353 average of  $F_{ST}$  values inside each geographical regions (correlation coefficient of 0.97). The  
354 second axis of the PCA using the Marseille individuals showed apparent association with  
355 depth and appeared to be influenced by the variation of the candidates for local adaptation to  
356 depth detected by ARLEQUIN: 51 % of these loci were in the top 1 % of the axis  
357 contributions, and 86 % were in the top 5 %.

358 Because the Marseille region is the only one presenting a principal component linked with  
359 depth (Fig. 1C), the pcadapt results obtained for the Corsica et Banyuls regions have poor  
360 biological relevance for our biological question. We chose thus to present only the pcadapt  
361 results obtained for the Marseille region. Pcadapt detected 58 outliers loci linked with the  
362 second PCA axis, the one which was linked to depth differentiation. All these candidates were  
363 detected by the ARLEQUIN analyses and 20 were also common with the  $\chi^2$  test presented  
364 above.

365

### 366 *Functional annotation*

367 Among the 27 461 analyzed RAD-tags, 6 376 had hits on the red coral transcriptome  
368 (23.2 %). Concerning SNPs detected as outliers by ARLEQUIN and contributing to the depth  
369 divergence, 8 on the 35 detected in Marseille had hits on the transcriptome, 46 on the 248  
370 detected in Corsica and 2 on the 2 detected in Banyuls (Table S3). We did not observed any  
371 GO term enriched in coding regions among candidates SNPs, nor any functional enrichment  
372 in these outliers.

373

## 374 DISCUSSION

35

375 *Genetic diversity and structure*

376 Our results confirm at a genomic the high genetic structure of the red coral, which was  
377 observed with a small number of microsatellite loci (Costantini *et al.*, 2007; Ledoux *et al.*,  
378 2010b). These results could be the consequence of reduced mean larval dispersal distance,  
379 despite a quite long pelagic larval duration estimated in aquarium (from 16 to 42 days;  
380 Martínez-Quintana *et al.*, 2015). Genetic incompatibilities could also contribute to the  
381 observed differentiation at least for some loci (Kulmuni and Westram, 2017). Our analysis of  
382 the genetic structure of the red coral revealed several clusters mainly corresponding to the  
383 geographical distributions of this species. The relative and unexpected proximity of the  
384 populations from Banyuls and the two populations of Galeria (GAL20 and GAL40) according  
385 to PCA was also suggested with microsatellite data (Ledoux *et al.*, 2010b). A high  
386 differentiation was observed here with PCA and STRUCTURE between the two sites of  
387 Corsica separated by around 22 km. This pattern of genetic structure could be explained by a  
388 putative barrier to gene flow (through currents or lack of suitable habitats) between the two  
389 Corsican sites, or it could also correspond to an historical separation of these populations: two  
390 lineages could then be present in Corsica, with one being related to Banyuls populations.

391 We reported here a significant vertical genetic structure between the two depths of the same  
392 site (populations separated by less than 20 m). This differentiation was also observed when  
393 outlier loci were removed indicating that it is also shaped by neutral processes (migration /  
394 drift) as suggested previously with microsatellites (e.g. Ledoux *et al.*, 2010a). In a study of the  
395 vertical genetic structure of red coral in two western Mediterranean sites (Cap de Creus, Spain  
396 and Portofino, Italia), Costantini *et al.* (2011) observed a drop in connectivity around 40 – 50

36 18

37

397 m depth, with genetic diversity declining with depth, but our sampling scheme did not allow  
398 us to test this hypotheses. The study of the vertical genetic structure in corals is important in  
399 the context of climate change. As deeper populations may be less affected by climate change,  
400 they could possibly reseed shallower populations (Bongaerts *et al.*, 2017). Nevertheless this  
401 possibility of reseeding depends on the connectivity or potential barriers between depths. A  
402 lack of connectivity could erroneously be inferred in cases of cryptic species (Pante *et al.*,  
403 2015). Contrary to Prada *et al.* (2008) who showed the existence of two cryptic lineages at  
404 two different depths in a tropical octocoral, the populations of red coral from the two studied  
405 depths clearly correspond here to the same species, and the differentiation between depth was  
406 lower than the differentiation between sites and regions. This vertical structure may be the  
407 result of both inherent life history traits and environmental variables. Weinberg (1979) has  
408 described a negative geotropism for the planulae of *C. rubrum*, and Martínez-Quintana *et al.*  
409 (2015) demonstrated that this was an active behavior. Depending on the orientation of the  
410 substrate, this can limit the connectivity between depths. The seasonal stratification during  
411 larval emission (which can occur from June to September; Haguenaer A., pers. comm.) could  
412 also limit dispersal. According to these hypotheses the larval behavior and oceanographic  
413 factors should lead to the genome-wide neutral differentiation between depths. This  
414 differentiation is probably also shaped by drift induced by the small effective size of red coral  
415 populations (Ledoux *et al.*, 2010a).

416 The horizontal genetic differentiation between the two shallow sites was higher than those  
417 between the two corresponding deep sites, inside and between geographical region. This  
418 suggests a higher connectivity or lower rate of genetic drift for deep populations compared to

38 19

39

419 shallow ones. The repeated colonization of shallow depths from deeper ones or the higher  
420 harvesting pressure on shallow populations compared to deep one could enhance genetic drift  
421 as well (Rossi *et al.*, 2008; Cannas *et al.*, 2016). We did not observe here a reduction in gene  
422 diversity for shallow populations, connectivity differences then seem to be more probable in  
423 explaining the observed differences of genetic differentiation. Interestingly, Rossi *et al.* (2008)  
424 observed a higher frequency of patches of red coral below 50 m compared to above 50 m: if  
425 such pattern is present in the area and depths considered here, then it could increase gene flow  
426 through stepping stones migration. The observed vertical and horizontal genetic structure  
427 could indicate reduced recolonization abilities following disturbances such as mortality event  
428 induced by heat waves. Nevertheless the observed genetic structure could also be shaped by  
429 colonization history and monopolization effect (Orsini *et al.*, 2013). In this case, a disturbance  
430 leading to free habitats would facilitate recolonization from other populations.

431

#### 432 *Potential biases in the search of outlier loci*

433 We observed high  $F_{ST}$  values for different loci and different sample comparisons, and not only  
434 between depths (Fig. S4). The methods used here to identify selected loci will most likely  
435 detect loci with strong effects (Pritchard and Di Rienzo, 2010; Gagnaire and Gaggiotti, 2016),  
436 and it is highly improbable to observe such a high number of selected loci. Both hierarchical  
437 genetic structure and high levels of differentiation are known to lead to a high number of false  
438 positives in genomic studies of local adaptation (Bierne *et al.*, 2013; Hoban *et al.* 2016). Here  
439 we observed a positive correlation between the number of outliers detected and both the  
440 variance and average of  $F_{ST}$  values inside each geographical region, with the strongest effect

40 20

41

441 in Corsica, stressing the role of false positive in these results.

442 The markers density obtained with RAD-Seq may be also insufficient to detect a RAD-tag in  
443 linkage disequilibrium with a selected locus (Lowry *et al.*, 2017; McKinney *et al.*, 2017;  
444 Catchen *et al.*, 2017). With 138 810 detected SNPs and a genome size of about 500 Mb  
445 (Ganot *et al.*, 2016), we expected in the case of the red coral, a SNP sampling of 1 for 3,60 kb  
446 (278 SNPs per Mb) and 1 for 18 kb after the SNPs filtering steps (55 SNPs per Mb). The  
447 reduced gene flow and high genetic drift in the red coral probably lead to much higher linkage  
448 disequilibrium (maybe a few kb) than in most other marine metazoans. We thus expect that  
449 our RAD-tags at least detect a signal of genetic adaptation, even if we did not detect a certain  
450 number of genomic regions under selection.

451 Apart from the detection of selected loci, the observed levels of genetic structure raises an  
452 interrogation on the mere evolution of local adaptation. Indeed the red coral displays life  
453 history traits potentially favorable to the evolution of local adaptation such as reduced  
454 dispersal limiting gene swamping; (Lenormand, 2002). But in each local population the  
455 important genetic drift (Ledoux *et al.*, 2010a) can counteract the effects of local selection and  
456 limit differences in allele frequencies for low to moderately selected loci.

457 In order to better understand if local adaptation is involved in the observed genomic pattern  
458 we could test the correlation between differences in allele frequencies between depths and the  
459 strength of divergent selection, as estimated from the thermal regime for example.  
460 Unfortunately, in the red coral the ecological distances are usually paired with genetic  
461 differentiation in such a way that we can't disentangle the drift and selective effects on the  
462 number of outliers detected.

42 21

43

463 Considering these limits, and in order to identify the most promising candidate genes, we  
464 applied a combination of different methods and a careful evaluation of the general structure  
465 and of the loci shaping differences between depths. The loci identified in this way are those  
466 which best support the hypothesis of local adaptation. Approaches dedicated to the study of  
467 polygenic adaptation (Daub *et al.*, 2013) or to the genomic distribution of  $F_{ST}$  or nucleotide  
468 diversity (Hohenlohe *et al.*, 2010) could be interesting here used, but a reference genome is  
469 still lacking for the red coral.

470 On a more theoretical point of view, outlier loci could be linked to intrinsic genetic  
471 incompatibilities whose allelic frequencies coupled with environmental barriers (Bierne *et al.*,  
472 2011). The frequency of genetic incompatibilities in marine populations is largely unknown  
473 but probably under-estimated (Plough *et al.*, 2016). Even if not directly linked to local  
474 adaptation, such loci are important factors in the evolution of red coral populations.

475

#### 476 *Local adaptation to depth in the red coral*

477 We focused on candidate loci meeting the following criteria: i) detection with ARLEQUIN  
478 and padapt, ii) significant differentiation between depth, iii) function relevant to the  
479 adaptation to thermal regime. These loci are the most relevant as factors of local adaptation.

480 The absence of candidate SNPs common to the three geographical regions could indicate that  
481 the adaptation to comparable shallow environmental pressures in these independent regions  
482 are based on different genetic pathways, or on non-genetic mechanisms (Putnam and Gates,  
483 2015). However, most candidate loci should be in linkage disequilibrium with selected loci,  
484 and such association can easily be lost between distant locations through recombination.

44 22

45

485 Differences in the strength of selective pressure in the three regions could also explain the  
486 differences in the detected loci. In Marseille we evidenced a clear signal of differentiation  
487 between depths according to multivariate and outlier loci analyses. This detection of a signal  
488 of local adaptation in the Marseille region is consistent with the observations from studies of  
489 thermotolerance differences in this region (Torrents *et al.*, 2008; Haguenaer *et al.*, 2013;  
490 Ledoux *et al.*, 2015; Pralong *et al.*, 2015). In the case of the Marseille region there are then  
491 strong evidences of the existence of adaptive differentiation at a scale of few tens of meters  
492 only. Concerning Corsican populations, Ledoux *et al.* (2015) reported no phenotypic signal of  
493 local adaptation after reciprocal transplant experiment. Here, the most promising candidate for  
494 the adaptation to thermal regime, was an homologous to an allene oxide synthase-  
495 lipoyxygenase which is known to be involved in the response to thermal stress in octocorals  
496 (Löhelaïd *et al.*, 2015). This indirect argument would support the presence of local adaptation  
497 in this area as well, but more experimental analyzes will be necessary to confirm the  
498 involvement of this function in adaptation to thermal stress in this species. Finally, the  
499 detection of a reduced number of candidate loci (two) in the Banyuls region would be  
500 consistent with the weaker selective pressure here (see above, Table 2).

501 Previously, we have sequenced the transcriptome of individuals from the two depths of the  
502 Marseille site studied here in Marseille (Pralong *et al.*, 2015). Several genes were  
503 differentially expressed between individuals from the two depths outside thermal stress  
504 conditions. Some of these genes, such as those from the Tumor Necrosis Factors Receptor  
505 Associated Factors (TRAF) family, have been identified as involved in the response to  
506 thermal stress in the hexacoral *Acropora hyacinthus* (Barshis *et al.*, 2013). However, none of

47

507 these differentially expressed genes were identified in our RAD-Seq study. Additionally the  
508 differences of expression may result from acclimatization, and are not necessarily adaptive.  
509 The use of a reference genome would be useful here as well to study the potential link  
510 between candidate SNPs and genes location and function (Manel *et al.*, 2016).



49

511 CONCLUSION

512 To our knowledge, the red coral presents among the highest levels of differentiation among  
513 studies of local adaptation through genome scans approaches in marine environment  
514 (Bradbury *et al.*, 2010; Limborg *et al.*, 2012; Wang *et al.*, 2013; Chu *et al.*, 2014; Milano *et*  
515 *al.*, 2014; Bay and Palumbi, 2014; Bernardi *et al.*, 2016; Araneda *et al.*, 2016; Guo *et al.*,  
516 2016; Benestan *et al.*, 2016; Bongaerts *et al.*, 2017). This study enabled us to empirically  
517 emphasize the limitations in the detection and the interpretation of signals of local adaptation  
518 using usual statistical methods in this strongly structured species. Both neutral and adaptive  
519 divergence highlighted here demonstrate the genetic singularity of shallow populations of  
520 the red coral, especially in the Marseille region where the shallowest populations of this species  
521 are found. Together, the strong genetic structure we observed between shallow populations,  
522 the low dispersal abilities of the red coral and the local adaptation of these individuals to the  
523 highly variable thermal conditions they experience, raise strong concerns about the evolution  
524 of shallow populations and the possibility of loss of adaptive variations in case of mortality  
525 events. Extending the genomic study initiated here would be useful to study the evolution of  
526 this species in heterogeneous and changing environments. Whatever their origin (genetic or  
527 environmental), the different thermotolerance levels observed between depths and populations  
528 in the red coral should also be taken into account in future studies of adaptive evolution in this  
529 species.

51

530 Acknowledgements:

531 This work is a contribution to the Labex OT-Med (n° ANR-11-LABX-0061) funded by the  
532 French Government “Investissements d’Avenir” program of the French National Research  
533 Agency (ANR) through the A\*MIDEX project (n° ANR-11-IDEX-0001-02). This project has  
534 been funded by the ADACNI program of the French National Research Agency (ANR)  
535 (project n°ANR-12-ADAP-0016; <http://adacni.imbe.fr>). We thank ECCOREV Research  
536 Federation (FR 3098) for the financial support of part of this study. The project leading to this  
537 publication has received funding from European FEDER Fund under project 1166-39417. We  
538 thank Nicolas Fernandez and Béatrice Loriod from the Marseille TGML platform for their  
539 invaluable help and advice with the preparation of the RAD libraries; the team of the MGX  
540 platform for the sequencing of the RAD libraries. The authors thank the UMR 8199 LIGAN-  
541 PM Genomics platform (Lille, France, especially Véronique Dhennin) which belongs to the  
542 'Federation de Recherche' 3508 Labex EGID (European Genomics Institute for Diabetes;  
543 ANR-10-LABX-46) and was supported by the ANR Equipex 2010 session (ANR-10-EQPX-  
544 07-01; 'LIGAN-PM'). The LIGAN-PM Genomics platform (Lille, France) is also supported  
545 by the FEDER and the Region Nord-Pas-de-Calais-Picardie. We thank the molecular biology  
546 service of the IMBE, the informatic service of the Pytheas Institute (especially Maurice Libes)  
547 and Frédéric Zuberer of the Pytheas Institute for his support in sampling. We thank the  
548 Scandola Natural Reserve, especially Jean-Marie Dominici. We thank Manuela Carezni,  
549 Pierre-Alexandre Gagnaire, François Bonhomme and Nicolas Bierne for stimulating  
550 discussions.

52 26

53

551 References

- Alleaume-Benharira M, Pen IR, Ronce O (2006). Geographical patterns of adaptation within a species' range: interactions between drift and gene flow. *J Evol Biol* **19**: 203–215.
- Altschul SF, Gish W, Miller W, Myers EW, Lipman DJ (1990). Basic local alignment search tool. *J Mol Biol* **215**: 403–410.
- Araneda C, Larraín MA, Hecht B, Narum S (2016). Adaptive genetic variation distinguishes Chilean blue mussels (*Mytilus chilensis*) from different marine environments. *Ecol Evol* **6**: 3632–3644.
- Ayre DJ (1995). Localized adaptation of sea anemone clones: evidence from transplantation over two spatial scales. *J Anim Ecol*: 186–196.
- Barrett RD, Hoekstra HE (2011). Molecular spandrels: tests of adaptation at the genetic level. *Nat Rev Genet* **12**: 767–780.
- Barshis DJ, Ladner JT, Oliver TA, Seneca FO, Traylor-Knowles N, Palumbi SR (2013). Genomic basis for coral resilience to climate change. *Proc Natl Acad Sci* **110**: 1387–1392.
- Barshis DJ, Stillman JH, Gates RD, Toonen RJ, Smith LW, Birkeland C (2010). Protein expression and genetic structure of the coral *Porites lobata* in an environmentally extreme Samoan back reef: does host genotype limit phenotypic plasticity? *Mol Ecol* **19**: 1705–1720.
- Bay RA, Palumbi SR (2014). Multilocus Adaptation Associated with Heat Resistance in Reef-Building Corals. *Curr Biol* **24**: 2952–2956.
- Benestan L, Quinn BK, Maaroufi H, Laporte M, Rochette R, Bernatchez L (2016). Seascape genomics provides evidence for thermal adaptation and current-mediated population structure in American lobster (*Homarus americanus*). *Mol Ecol* **25(20)**: 5073–5092.
- Benjamini Y, Hochberg Y (1995). Controlling the False Discovery Rate: A Practical and Powerful Approach to Multiple Testing. *J R Stat Soc Ser B Methodol* **57**: 289–300.
- Bernardi G, Azzurro E, Golani D, Miller MR (2016). Genomic signatures of rapid adaptive evolution in the bluespotted cornetfish, a Mediterranean Lessepsian invader. *Mol Ecol* **25(14)** : 3384–3396.
- Bierne N, Roze D, Welch JJ (2013). Pervasive selection or is it...? why are FST outliers sometimes so frequent? *Mol Ecol* **22**: 2061–2064.
- Bierne N, Welch J, Loire E, Bonhomme F, David P (2011). The coupling hypothesis: why genome scans may fail to map local adaptation genes. *Mol Ecol* **20**: 2044–2072.

54 27

- Boavida J, Paulo D, Aurelle D, Arnaud-Haond S, Marschal C, Reed J, *et al.* (2016). A well-kept treasure at depth: precious red coral rediscovered in Atlantic deep coral gardens (SW Portugal) after 300 years. *PLoS One* **11**: e0147228.
- Bongaerts P, Riginos C, Brunner R, Englebert N, Smith SR, Hoegh-Guldberg O (2017). Deep reefs are not universal refuges: Reseeding potential varies among coral species. *Sci Adv* **3**: e1602373.
- Bongaerts P, Riginos C, Hay KB, Oppen MJ van, Hoegh-Guldberg O, Dove S (2011). Adaptive divergence in a scleractinian coral: physiological adaptation of *Seriatopora hystrix* to shallow and deep reef habitats. *BMC Evol Biol* **11**: 303.
- Bradbury IR, Hubert S, Higgins B, Borza T, Bowman S, Paterson IG, *et al.* (2010). Parallel adaptive evolution of Atlantic cod on both sides of the Atlantic Ocean in response to temperature. *Proc R Soc Lond B Biol Sci* **277**: 3725–3734.
- Cannas R, Sacco F, Cau A, Cuccu D, Follesa MC, Cau A (2016). Genetic monitoring of deep-water exploited banks of the precious Sardinia coral *Corallium rubrum* (L., 1758): useful data for a sustainable management. *Aquat Conserv Mar Freshw Ecosyst* **26**: 236–250.
- Catchen JM, Amores A, Hohenlohe P, Cresko W, Postlethwait JH (2011). Stacks: building and genotyping loci de novo from short-read sequences. *G3 Genes Genomes Genet* **1**: 171–182.
- Catchen J, Hohenlohe PA, Bassham S, Amores A, Cresko WA (2013). Stacks: an analysis tool set for population genomics. *Mol Ecol* **22**: 3124–3140.
- Catchen JM, Hohenlohe PA, Bernatchez L, Funk WC, Andrews KR, Allendorf FW (2017). Unbroken: RADseq remains a powerful tool for understanding the genetics of adaptation in natural populations. *Mol Ecol Resour* **17(3)**: 362–365.
- Chu ND, Kaluziak ST, Trussell GC, Vollmer SV (2014). Phylogenomic analyses reveal latitudinal population structure and polymorphisms in heat stress genes in the North Atlantic snail *Nucella lapillus*. *Mol Ecol* **23**: 1863–1873.
- Conesa A, Götz S, García-Gómez JM, Terol J, Talón M, Robles M (2005). Blast2GO: a universal tool for annotation, visualization and analysis in functional genomics research. *Bioinformatics* **21**: 3674–3676.
- Coop G, Witonsky D, Rienzo AD, Pritchard JK (2010). Using Environmental Correlations to Identify Loci Underlying Local Adaptation. *Genetics* **185**: 1411–1423.
- Costantini F, Fauvelot C, Abbiati M (2007). Genetic structuring of the temperate gorgonian coral (*Corallium rubrum*) across the western Mediterranean Sea revealed by microsatellites and nuclear sequences. *Mol Ecol* **16**: 5168–5182.

- Costantini F, Rossi S, Pintus E, Cerrano C, Gili J-M, Abbiati M (2011). Low connectivity and declining genetic variability along a depth gradient in *Corallium rubrum* populations. *Coral Reefs* **30**: 991–1003.
- Danecek P, Auton A, Abecasis G, Albers CA, Banks E, DePristo MA, *et al.* (2011). The variant call format and VCFtools. *Bioinformatics* **27**: 2156–2158.
- Daub JT, Hofer T, Cutivet E, Dupanloup I, Quintana-Murci L, Robinson-Rechavi M, *et al.* (2013). Evidence for polygenic adaptation to pathogens in the human genome. *Mol Biol Evol* **30**(7): 1544-1558.
- DeWitt TJ, Sih A, Wilson DS (1998). Costs and limits of phenotypic plasticity. *Trends Ecol Evol* **13**: 77–81.
- Doney SC, Ruckelshaus M, Duffy JE, Barry JP, Chan F, English CA, *et al.* (2012). Climate change impacts on marine ecosystems. *An Rev Mar Sci* **4**(1) : 11-37.
- Etter PD, Bassham S, Hohenlohe PA, Johnson EA, Cresko WA (2011). SNP discovery and genotyping for evolutionary genetics using RAD sequencing. In *Molecular methods for evolutionary genetics*, Humana press. pp 157-178.
- Evanno G, Regnaut S, Goudet J (2005). Detecting the number of clusters of individuals using the software STRUCTURE: a simulation study. *Mol Ecol* **14**: 2611–2620.
- Excoffier L, Lischer HEL (2010). Arlequin suite ver 3.5: a new series of programs to perform population genetics analyses under Linux and Windows. *Mol Ecol Resour* **10**: 564–567.
- Falush D, Stephens M, Pritchard JK (2003). Inference of population structure using multilocus genotype data: linked loci and correlated allele frequencies. *Genetics* **164**: 1567–1587.
- Falush D, Stephens M, Pritchard JK (2007). Inference of population structure using multilocus genotype data: dominant markers and null alleles. *Mol Ecol Notes* **7**: 574–578.
- Felsenstein J (1975). Genetic Drift in Clines Which Are Maintained by Migration and Natural-Selection. *Genetics* **81**: 191–207.
- Gagnaire P-A, Gaggiotti OE (2016). Detecting polygenic selection in marine populations by combining population genomics and quantitative genetics approaches. *Curr Zool* **62**(6): 603-616.
- Ganot P, Fritz M, Rausch T, Aurelle D, Haguenaer A, Romans P, *et al.* (2016). Calcification in *Corallium rubrum*: dissecting the process using genomics and transcriptomics together with scalpels and scissors. 13<sup>th</sup> International Coral Reef Symposium,

Honolulu, Hawai'i

- Garrabou J, Coma R, Bensoussan N, Bally M, Chevaldonné P, Cigliano M, *et al.* (2009). Mass mortality in Northwestern Mediterranean rocky benthic communities: effects of the 2003 heat wave. *Glob Change Biol* **15**: 1090–1103.
- Garrabou J, Perez T, Sartoretto S, Harmelin JG (2001). Mass mortality event in red coral *Corallium rubrum* populations in the Provence region (France, NW Mediterranean). *Mar Ecol Prog Ser* **217**: 263–272.
- Guo B, Li Z, Merilä J (2016). Population genomic evidence for adaptive differentiation in the Baltic Sea herring. *Mol Ecol* **25**: 2833–2852.
- Haguenaer A, Zuberer F, Ledoux J-B, Aurelle D (2013). Adaptive abilities of the Mediterranean red coral *Corallium rubrum* in a heterogeneous and changing environment: from population to functional genetics. *J Exp Mar Biol Ecol* **449**: 349–357.
- Hastings A, Rohlf FJ (1974). Gene Flow: Effect in Stochastic Models of Differentiation. *Am Nat* **108**: 701–705.
- Hoban S, Kelley JL, Lotterhos KE, Antolin MF, Bradburd G, Lowry DB, *et al.* (2016). Finding the genomic basis of local adaptation: pitfalls, practical solutions, and future directions. *Am Nat* **188**: 379–397.
- Hofer T, Ray N, Wegmann D, Excoffier L (2009). Large allele frequency differences between human continental groups are more likely to have occurred by drift during range expansions than by selection. *Ann Hum Genet* **73**: 95–108.
- Hohenlohe PA, Bassham S, Etter PD, Stiffler N, Johnson EA, Cresko WA (2010). Population Genomics of Parallel Adaptation in Threespine Stickleback using Sequenced RAD Tags. *PLoS Genet* **6**: e1000862.
- Hubisz MJ, Falush D, Stephens M, Pritchard JK (2009). Inferring weak population structure with the assistance of sample group information. *Mol Ecol Resour* **9**: 1322–1332.
- Jin YK, Lundgren P, Lutz A, Raina J-B, Howells EJ, Paley AS, *et al.* (2016). Genetic markers for antioxidant capacity in a reef-building coral. *Sci Adv* **2**: e1500842.
- Jombart T (2008). adegenet: a R package for the multivariate analysis of genetic markers. *Bioinformatics* **24**: 1403–1405.
- Jones FC, Grabherr MG, Chan YF, Russell P, Mauceli E, Johnson J, *et al.* (2012). The genomic basis of adaptive evolution in threespine sticklebacks. *Nature* **484**: 55–61.
- Kawecki TJ, Ebert D (2004). Conceptual issues in local adaptation. *Ecol Lett* **7**: 1225–1241.

61

- Kersting DK, Bensoussan N, Linares C (2013). Long-Term Responses of the Endemic Reef-Builder *Cladocora caespitosa* to Mediterranean Warming. *PLoS ONE* **8**: e70820.
- Knittweis L, Aguilar R, Alvarez H, Borg J, Evans J, Garcia S, *et al.* (2016). New depth record of the precious red coral *Corallium rubrum* for the Mediterranean. *antiquity* **7**: 8.
- Kopelman NM, Mayzel J, Jakobsson M, Rosenberg NA, Mayrose I (2015). Clumpak: a program for identifying clustering modes and packaging population structure inferences across K. *Mol Ecol Resour* **15**: 1179–1191.
- Kulmuni J, Westram AM (2017). Intrinsic incompatibilities evolving as a by-product of divergent ecological selection: Considering them in empirical studies on divergence with gene flow. *Mol Ecol* **26**: 3093–3103.
- Ledoux J-B, Aurelle D, Bensoussan N, Marschal C, Féral J-P, Garrabou J (2015). Potential for adaptive evolution at species range margins: contrasting interactions between red coral populations and their environment in a changing ocean. *Ecol Evol* **5**: 1178–1192.
- Ledoux J-B, Garrabou J, Bianchimani O, Drap P, Féral J-P, Aurelle D (2010a). Fine-scale genetic structure and inferences on population biology in the threatened Mediterranean red coral, *Corallium rubrum*. *Mol Ecol* **19**: 4204–4216.
- Ledoux J-B, Mokhtar-Jamaï K, Roby C, Féral J-P, Garrabou J, Aurelle D (2010b). Genetic survey of shallow populations of the Mediterranean red coral [*Corallium rubrum* (Linnaeus, 1758)]: new insights into evolutionary processes shaping nuclear diversity and implications for conservation. *Mol Ecol* **19**: 675–690.
- Lenormand T (2002). Gene flow and the limits to natural selection. *Trends Ecol Evol* **17**: 183–189.
- Li H, Durbin R (2009). Fast and accurate short read alignment with Burrows–Wheeler transform. *Bioinformatics* **25**: 1754–1760.
- Limborg MT, Helyar SJ, de Bruyn M, Taylor MI, Nielsen EE, Ogden ROB, *et al.* (2012). Environmental selection on transcriptome-derived SNPs in a high gene flow marine fish, the Atlantic herring (*Clupea harengus*). *Mol Ecol* **21**: 3686–3703.
- Löhelaid H, Teder T, Samel N (2015). Lipoxygenase-allene oxide synthase pathway in octocoral thermal stress response. *Coral Reefs* **34**: 143–154.
- Lowry DB, Hoban S, Kelley JL, Lotterhos KE, Reed LK, Antolin MF, *et al.* (2017). Breaking RAD: an evaluation of the utility of restriction site-associated DNA sequencing for genome scans of adaptation. *Mol Ecol Resour* **17(2)** : 142-152.
- Lundgren P, Vera JC, Peplow L, Manel S, Oppen MJ van (2013). Genotype – environment correlations in corals from the Great Barrier Reef. *BMC Genet* **14**: 9.

62 31



- Luu K, Bazin E, Blum MGB (2017). pcadapt: an R package to perform genome scans for selection based on principal component analysis. *Mol Ecol Resour* **17**: 67–77.
- Manel S, Perrier C, Pratlong M, Abi-Rached L, Paganini J, Pontarotti P, *et al.* (2016). Genomic resources and their influence on the detection of the signal of positive selection in genome scans. *Mol Ecol* **25**: 170–184.
- Marschal C, Garrabou J, Harmelin JG, Pichon M (2004). A new method for measuring growth and age in the precious red coral *Corallium rubrum* (L.). *Coral Reefs* **23**: 423–432.
- Martínez-Quintana A, Bramanti L, Viladrich N, Rossi S, Guizien K (2015). Quantification of larval traits driving connectivity: the case of *Corallium rubrum* (L. 1758). *Mar Biol* **162**: 309–318.
- McKinney GJ, Larson WA, Seeb LW, Seeb JE (2017). RADseq provides unprecedented insights into molecular ecology and evolutionary genetics: comment on Breaking RAD by Lowry *et al.* (2016). *Mol Ecol Resour* **17**: 356–361.
- Milano I, Babbucci M, Cariani A, Atanassova M, Bekkevold D, Carvalho GR, *et al.* (2014). Outlier SNP markers reveal fine-scale genetic structuring across European hake populations (*Merluccius merluccius*). *Mol Ecol* **23**: 118–135.
- Mumby PJ, Elliott IA, Eakin CM, Skirving W, Paris CB, Edwards HJ, *et al.* (2011). Reserve design for uncertain responses of coral reefs to climate change. *Ecol Lett* **14**: 132–140.
- Nagylaki T (1978). Random Genetic Drift in a Cline. *Proc Natl Acad Sci U S A* **75**: 423–426.
- Orsini L, Vanoverbeke J, Swillen I, Mergeay J, Meester L (2013). Drivers of population genetic differentiation in the wild: isolation by dispersal limitation, isolation by adaptation and isolation by colonization. *Mol Ecol* **22**: 5983–5999.
- Palumbi SR, Barshis DJ, Traylor-Knowles N, Bay RA (2014). Mechanisms of Reef Coral Resistance to Future Climate Change. *Science* **344(6186)** : 895–898.
- Pante E, Puillandre N, Viricel A, Arnaud-Haond S, Aurelle D, Castelin M, *et al.* (2015). Species are hypotheses: avoid connectivity assessments based on pillars of sand. *Mol Ecol* **24**: 525–544.
- Pigliucci M (2001). *Phenotypic plasticity: beyond nature and nurture*. JHU Press.
- Pivotto ID, Nerini D, Masmoudi M, Kara H, Chaoui L, Aurelle D (2015). Highly contrasted responses of Mediterranean octocorals to climate change along a depth gradient. *R Soc Open Sci* **2**: 140493.



65

- Plough L, Shin G, Hedgecock D (2016). Genetic inviability is a major driver of type III survivorship in experimental families of a highly fecund marine bivalve. *Mol Ecol* **25**: 895–910.
- Plummer M, Best N, Cowles K, Vines K (2006). CODA: Convergence diagnosis and output analysis for MCMC. *R News* **6**: 7–11.
- Prada C, Schizas NV, Yoshioka PM (2008). Phenotypic plasticity or speciation? A case from a clonal marine organism. *BMC Evol Biol* **8**: 1.
- Pratlong M, Haguenauer A, Chabrol O, Klopp C, Pontarotti P, Aurelle D (2015). The red coral (*Corallium rubrum*) transcriptome: a new resource for population genetics and local adaptation studies. *Mol Ecol Resour* **15**: 1205–1215.
- Pratlong M, Haguenauer A, Chenesseau S, Brener K, Mitta G, Toulza E, *et al.* (2017). Evidence for a genetic sex determination in Cnidaria, the Mediterranean red coral (*Corallium rubrum*). *R Soc Open Sci* **4**.
- Pritchard JK, Di Rienzo A (2010). Adaptation—not by sweeps alone. *Nat Rev Genet* **11**: 665–667.
- Pritchard JK, Stephens M, Donnelly P (2000). Inference of population structure using multilocus genotype data. *Genetics* **155**: 945–959.
- Putnam HM, Gates RD (2015). Preconditioning in the reef-building coral *Pocillopora damicornis* and the potential for trans-generational acclimatization in coral larvae under future climate change conditions. *J Exp Biol* **218**: 2365–2372.
- R Core Team (2016). *R: A Language and Environment for Statistical Computing*. R Foundation for Statistical Computing: Vienna, Austria.
- Rossi S, Tsounis G, Orejas C, Padrón T, Gili J-M, Bramanti L, *et al.* (2008). Survey of deep-dwelling red coral (*Corallium rubrum*) populations at Cap de Creus (NW Mediterranean). *Mar Biol* **154**: 533–545.
- Rousset F (2008). genepop'007: a complete re-implementation of the genepop software for Windows and Linux. *Mol Ecol Resour* **8**: 103–106.
- Sambrook J, Fritsch EF, Maniatis T, others (1989). *Molecular cloning*. Cold spring harbor laboratory press New York.
- Sanford E, Kelly MW (2011). Local Adaptation in Marine Invertebrates. *Annu Rev Mar Sci* **3**: 509–535.

66 33

- Santangelo G, Bramanti L, Rossi S, Tsounis G, Vielmini I, Lott C, *et al.* (2012). Patterns of variation in recruitment and post-recruitment processes of the Mediterranean precious gorgonian coral *Corallium rubrum*. *J Exp Mar Biol Ecol* **411**: 7–13.
- Sherman CDH, Ayre DJ (2008). Fine-scale adaptation in a clonal sea anemone. *Evol Int J Org Evol* **62**: 1373–1380.
- Slatkin M, Maruyama T (1975). Genetic drift in a cline. *Genetics* **81**: 209–222.
- Smith LW, Barshis D, Birkeland C (2007). Phenotypic plasticity for skeletal growth, density and calcification of *Porites lobata* in response to habitat type. *Coral Reefs* **26**: 559–567.
- Szulkin M, Gagnaire P-A, Bierne N, Charmantier A (2016). Population genomic footprints of fine-scale differentiation between habitats in Mediterranean blue tits. *Mol Ecol* **25**: 542–558.
- Torrents O, Tambutté E, Caminiti N, Garrabou J (2008). Upper thermal thresholds of shallow vs. deep populations of the precious Mediterranean red coral *Corallium rubrum* (L.): Assessing the potential effects of warming in the NW Mediterranean. *J Exp Mar Biol Ecol* **357**: 7–19.
- Ulstrup KE, Van Oppen MJH (2003). Geographic and habitat partitioning of genetically distinct zooxanthellae (*Symbiodinium*) in *Acropora* corals on the Great Barrier Reef. *Mol Ecol* **12**: 3477–3484.
- Villemereuil P, Gaggiotti OE (2015). A new FST-based method to uncover local adaptation using environmental variables. *Methods Ecol Evol* **6**: 1248–1258.
- Wang L, Liu S, Zhuang Z, Guo L, Meng Z, Lin H (2013). Population genetic studies revealed local adaptation in a high gene-flow marine fish, the small yellow croaker (*Larimichthys polyactis*). *PloS One* **8**: e83493.
- Weinberg S (1979). The light-dependent behaviour of planula larvae of *Eunicella singularis* and *Corallium rubrum* and its implication for octocorallian ecology. *Bijdr Tot Dierkd* **49**: 16–30.
- Wrange A-L, André C, Lundh T, Lind U, Blomberg A, Jonsson PJ, *et al.* (2014). Importance of plasticity and local adaptation for coping with changing salinity in coastal areas: a test case with barnacles in the Baltic Sea. *BMC Evol Biol* **14**: 156.
- Ziegler M, Roder CM, Büchel C, Voolstra CR (2014). Limits to physiological plasticity of the coral *Pocillopora verrucosa* from the central Red Sea. *Coral Reefs* **33**: 1115–1129.

69

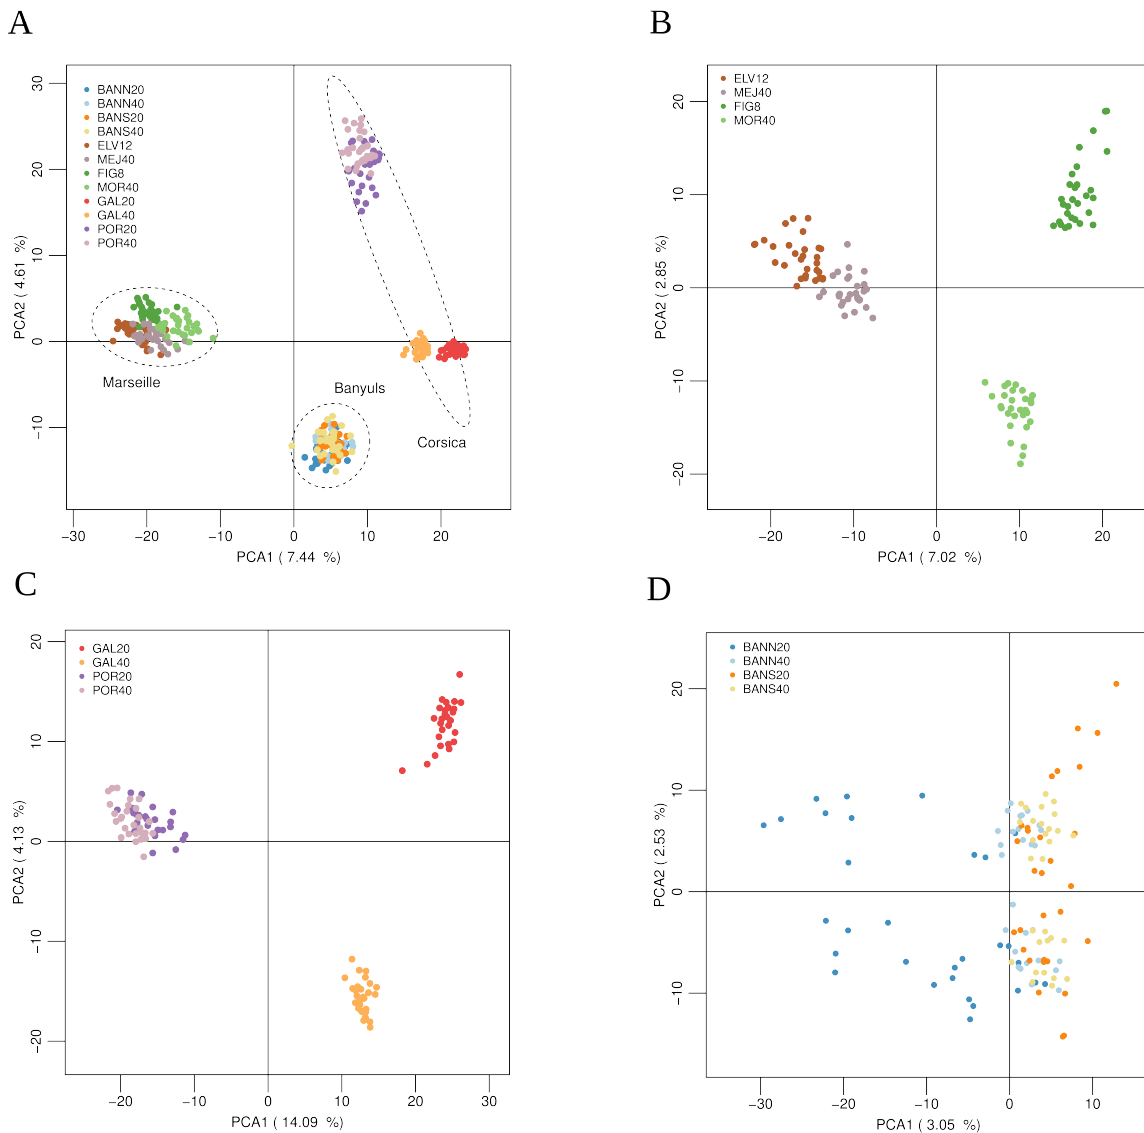

553 Figure 1. Principal component analysis (Axes 1 and 2) of A) the 12 red coral populations  
 554 (n = 354 individuals, 27 461 SNPs), B) the four red coral populations from Marseille (n =119  
 555 individuals, 27 461 SNPs), C) the four red coral populations from Corsica (n =117  
 556 individuals, 27 461 SNPs), D) the four red coral populations from Banyuls (n =118  
 557 individuals, 27 461 SNPs).

70 35

71

558

559

560

561

562

563

564

565

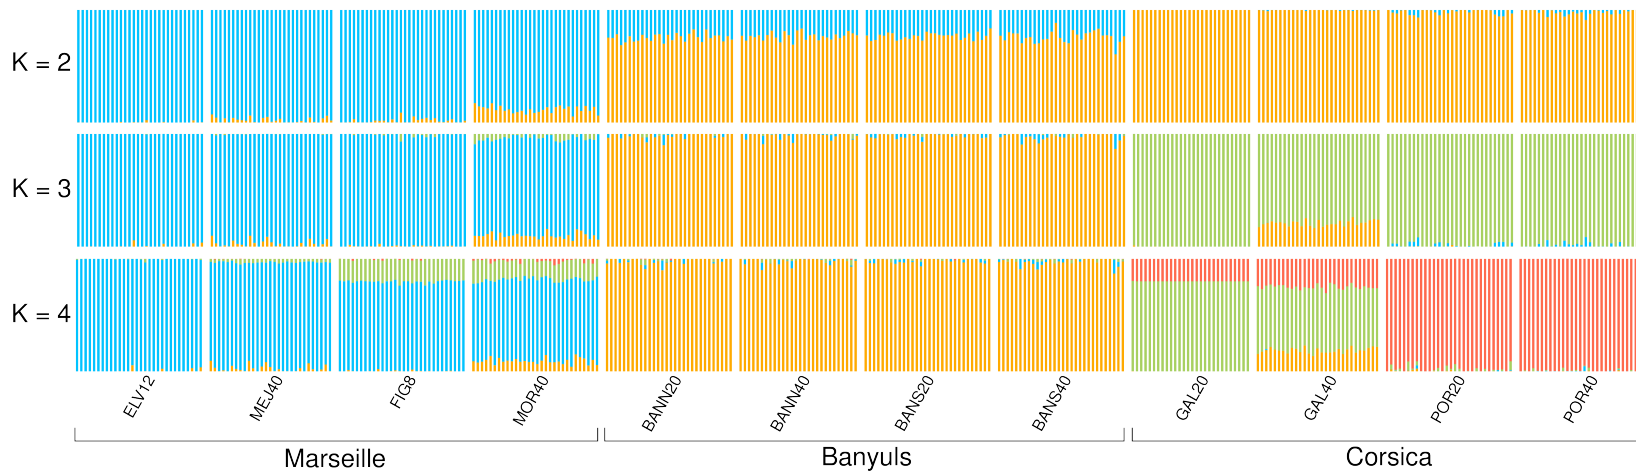

566

Figure 2. Results from Bayesian individual clustering with STRUCTURE for  $K = 2$  to  $K = 4$ . For  $K = 2$  and  $K = 4$ , all ten replicates produced the same

567

structure. For  $K = 3$ , the major mode presented here was the result of 7/10 replicates. Minor modes are presented in Fig. S3.

568

73

569 Table 1. Characteristics of red coral sampling sites.

| Population | Geographic region | Site            | Depth (m) | GPS          | GPS         |
|------------|-------------------|-----------------|-----------|--------------|-------------|
| FIG8       | Marseille         | Marseille South | 8         | 43° 12.330'N | 5° 26.790'E |
| MOR40      | Marseille         | Marseille South | 40        | 43° 12.060'N | 5° 27.100'E |
| ELV12      | Marseille         | Marseille North | 12        | 43° 19.780'N | 5° 14.210'E |
| MEJ40      | Marseille         | Marseille North | 40        | 43° 19.700'N | 5° 13.480'E |
| BANN20     | Banyuls           | Banyuls North   | 25        | 42° 26.890'N | 3° 10.330'E |
| BANN40     | Banyuls           | Banyuls North   | 35        | 42° 26.890'N | 3° 10.330'E |
| BANS20     | Banyuls           | Banyuls South   | 26        | 42° 26.390'N | 3° 10.790'E |
| BANS40     | Banyuls           | Banyuls South   | 36        | 42° 26.390'N | 3° 10.790'E |
| POR20      | Corsica           | Porto           | 21        | 42° 16.292'N | 8° 41.255'E |
| POR40      | Corsica           | Porto           | 33        | 42° 16.292'N | 8° 41.255'E |
| GAL20      | Corsica           | Galeria         | 26        | 42° 28.210'N | 8° 38.950'E |
| GAL40      | Corsica           | Galeria         | 36        | 42° 28.210'N | 8° 38.950'E |

570

571

75

572 Table 2. Temperatures (in °C) characteristics of the sampling sites from March 2012 to  
573 October 2014.

|        | Depth (m) | Minimum | Maximum | Mean  | Standard<br>Deviation |
|--------|-----------|---------|---------|-------|-----------------------|
| FIG8   | 8         | 12.63   | 26.92   | 17.03 | 3.52                  |
| MOR40  | 40        | 12.73   | 23.06   | 15.40 | 2.11                  |
| ELV12  | 12        | 11.81   | 26.70   | 16.60 | 3.24                  |
| MEJ40  | 40        | 11.86   | 22.87   | 15.29 | 2.18                  |
| BANN20 | 25        | 12.22   | 24.29   | 17.20 | 2.63                  |
| BANN40 | 35        | 9.41    | 23.83   | 14.49 | 2.45                  |
| BANS20 | 26        | 12.22   | 24.29   | 17.20 | 2.63                  |
| BANS40 | 36        | 9.41    | 23.83   | 14.49 | 2.45                  |
| POR20  | 21        | 12.51   | 25.91   | 17.51 | 3.41                  |
| POR40  | 33        | 12.56   | 23.83   | 16.26 | 2.45                  |
| GAL20  | 26        | 12.46   | 25.09   | 17.13 | 3.13                  |
| GAL40  | 36        | 12.56   | 23.83   | 16.26 | 2.45                  |

574

77

575

576 Table 3. Counts of SNP loci after each filtering step.

| Step               | Number of SNPs | Software                             |
|--------------------|----------------|--------------------------------------|
| After assembly     | 138 810        | Stacks                               |
| raw data           |                | (Catchen <i>et al.</i> , 2011, 2013) |
| Excluding loci not | 86 520         | VCFtools                             |
| in within          |                | (Danecek <i>et al.</i> , 2011)       |
| population HWE     | 56 844         | VCFtools                             |
| MAF 1 %            |                | (Danecek <i>et al.</i> , 2011)       |
| One SNPs per       | 27 461         |                                      |
| RAD-tag            |                |                                      |

577

578 Table 4. Measures of  $F_{IS}$  and gene diversity of the red coral populations based on 27 461

579 SNPs.

| Population | $F_{IS}$ | Gene diversity |
|------------|----------|----------------|
| BANN20     | 0.018    | 0.15           |
| BANN40     | 0.012    | 0.15           |
| BANS20     | 0.019    | 0.15           |
| BANS40     | 0.065    | 0.13           |
| ELV12      | 0.005    | 0.17           |
| MEJ40      | 0.053    | 0.18           |
| FIG8       | 0.005    | 0.18           |
| MOR40      | 0.036    | 0.18           |
| GAL20      | 0.013    | 0.09           |
| GAL40      | 0.019    | 0.13           |
| POR20      | 0.023    | 0.13           |
| POR40      | 0.009    | 0.15           |

580

78 39

79

581 Table 5. Pairwise  $F_{ST}$  estimates. All comparisons were highly significant. Intra-region  
 582 comparisons are highlighted.

|        | BANN20 | BANN40 | BANS20 | BANS40 | ELV12 | MEJ40 | FIG8 | MOR40 | GAL20 | GAL40 | POR20 | POR40 |
|--------|--------|--------|--------|--------|-------|-------|------|-------|-------|-------|-------|-------|
| BANN20 | -      |        |        |        |       |       |      |       |       |       |       |       |
| BANN40 | 0.02   | -      |        |        |       |       |      |       |       |       |       |       |
| BANS20 | 0.03   | 0.01   | -      |        |       |       |      |       |       |       |       |       |
| BANS40 | 0.03   | 0.01   | 0.01   | -      |       |       |      |       |       |       |       |       |
| ELV12  | 0.13   | 0.13   | 0.13   | 0.13   | -     |       |      |       |       |       |       |       |
| MEJ40  | 0.11   | 0.11   | 0.11   | 0.11   | 0.03  | -     |      |       |       |       |       |       |
| FIG8   | 0.14   | 0.13   | 0.13   | 0.13   | 0.10  | 0.08  | -    |       |       |       |       |       |
| MOR40  | 0.11   | 0.10   | 0.10   | 0.10   | 0.08  | 0.06  | 0.05 | -     |       |       |       |       |
| GAL20  | 0.18   | 0.17   | 0.17   | 0.17   | 0.24  | 0.22  | 0.24 | 0.21  | -     |       |       |       |
| GAL40  | 0.11   | 0.10   | 0.10   | 0.10   | 0.19  | 0.16  | 0.18 | 0.15  | 0.10  | -     |       |       |
| POR20  | 0.14   | 0.13   | 0.13   | 0.13   | 0.17  | 0.16  | 0.17 | 0.14  | 0.20  | 0.13  | -     |       |
| POR40  | 0.14   | 0.13   | 0.13   | 0.13   | 0.17  | 0.15  | 0.17 | 0.14  | 0.21  | 0.14  | 0.05  | -     |

583

584 Table 6. Percent of the variation explained by grouping populations according to their  
 585 geographical region on the analysis of molecular variance (performed with ARLEQUIN).

| Source of variation             | d.f. | Percentage of variation |
|---------------------------------|------|-------------------------|
| Among groups                    | 2    | 7.80                    |
| Among populations within groups | 9    | 7.07                    |
| Within populations              | 696  | 85.13                   |

586



81

587

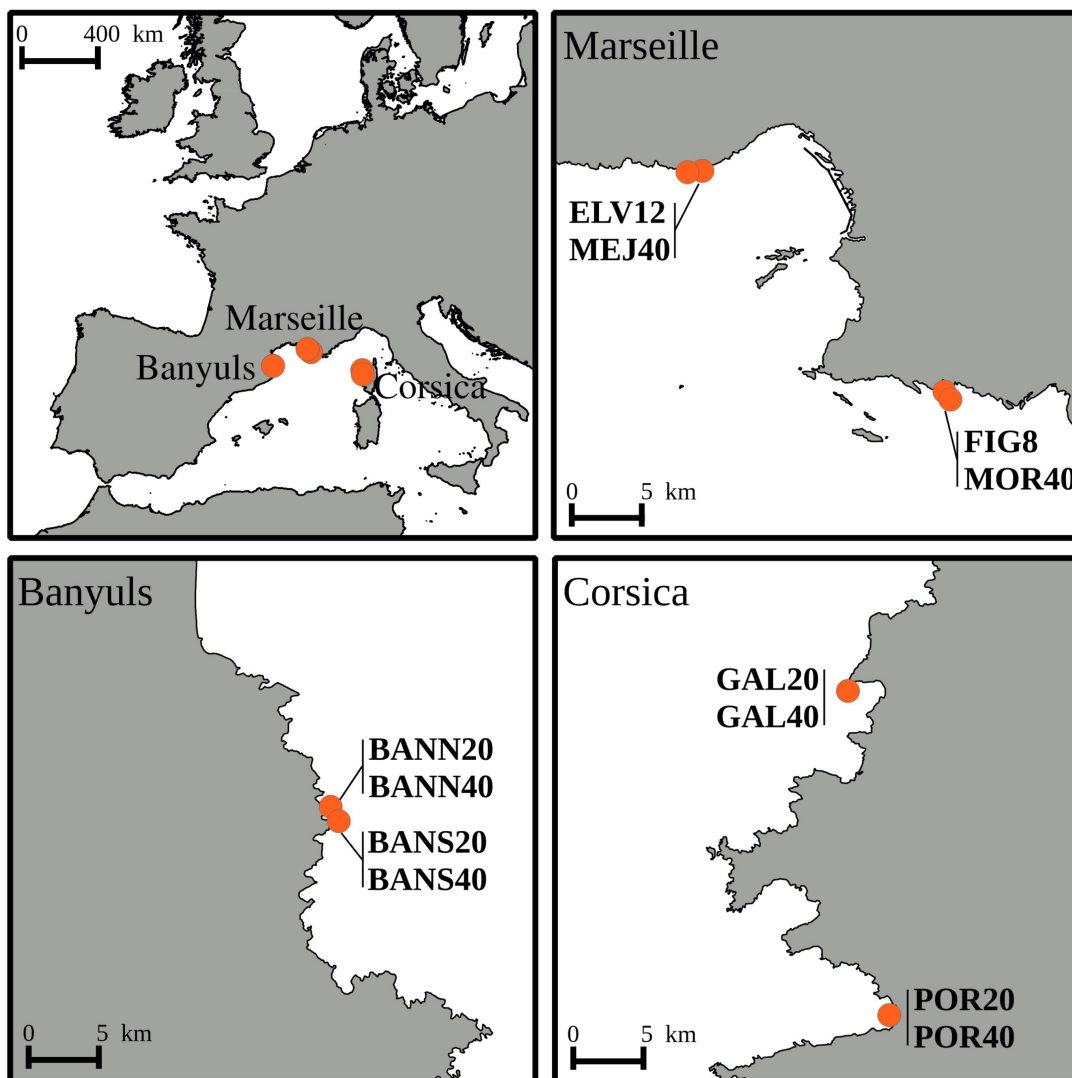

588 Figure S1. Location of the sampling sites of the red coral among the three studied  
589 geographical regions.

590

82 41

83

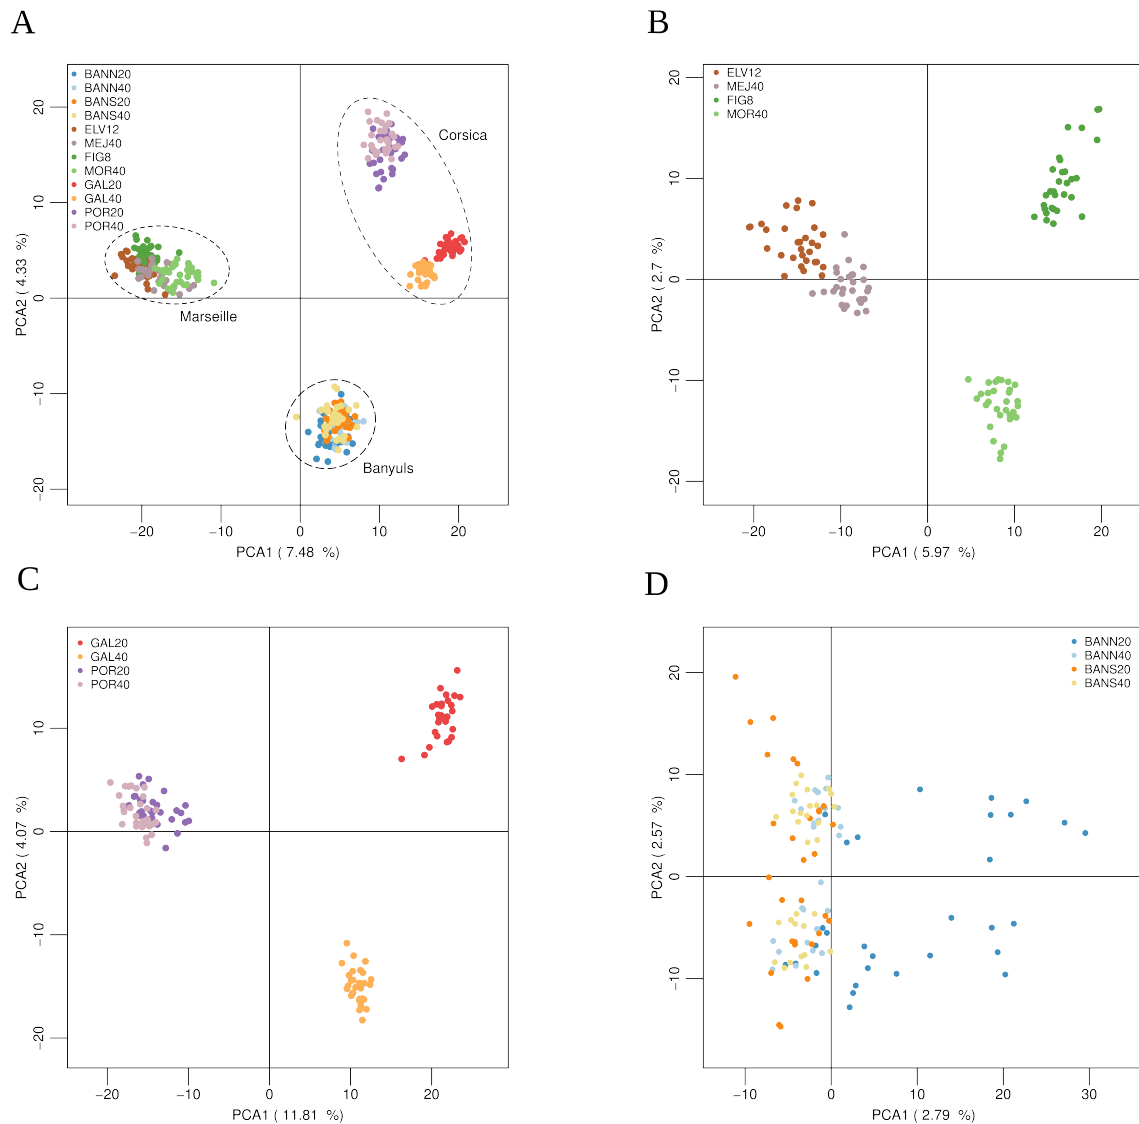

592 Figure S2. Principal component analysis (Axes 1 and 2), using only putative neutral SNPs, of  
593 the A) 12 red coral populations (n = 354 individuals, 25 669 SNPs), B) four red coral  
594 populations from Marseille (n = 119 individuals, 26 898 SNPs), C) four red coral populations  
595 from Corsica (n = 117 individuals, 26 592 SNPs), D) four red coral populations from Banyuls  
596 (n = 118 individuals, 27 069 SNPs).

84 42

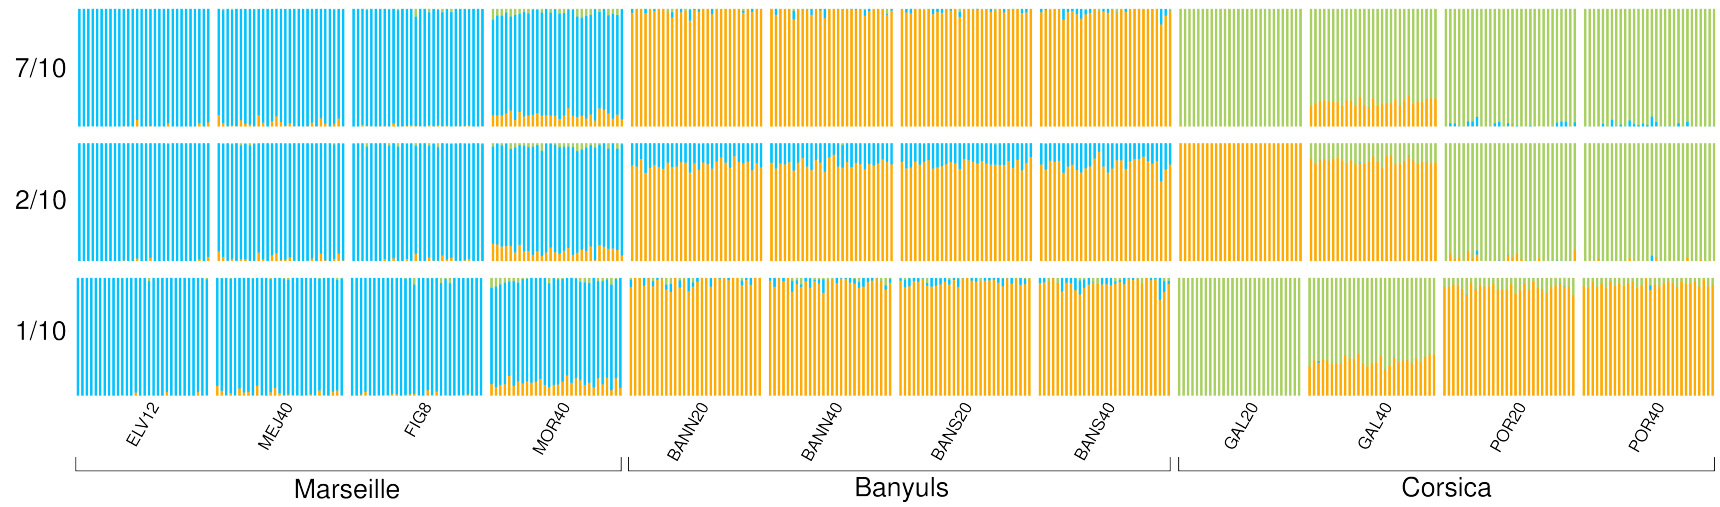

599 Figure S3. Results from Bayesian individual clustering with STRUCTURE for K = 3. The three figures correspond to major and minor modes detected.

87

603

604

605

606

607

608

609

610

611

612

613

614

615

616

617 Figure S4. Joint distribution of between-depths  $F_{ST}$  in the three geographical regions.

618

619

88

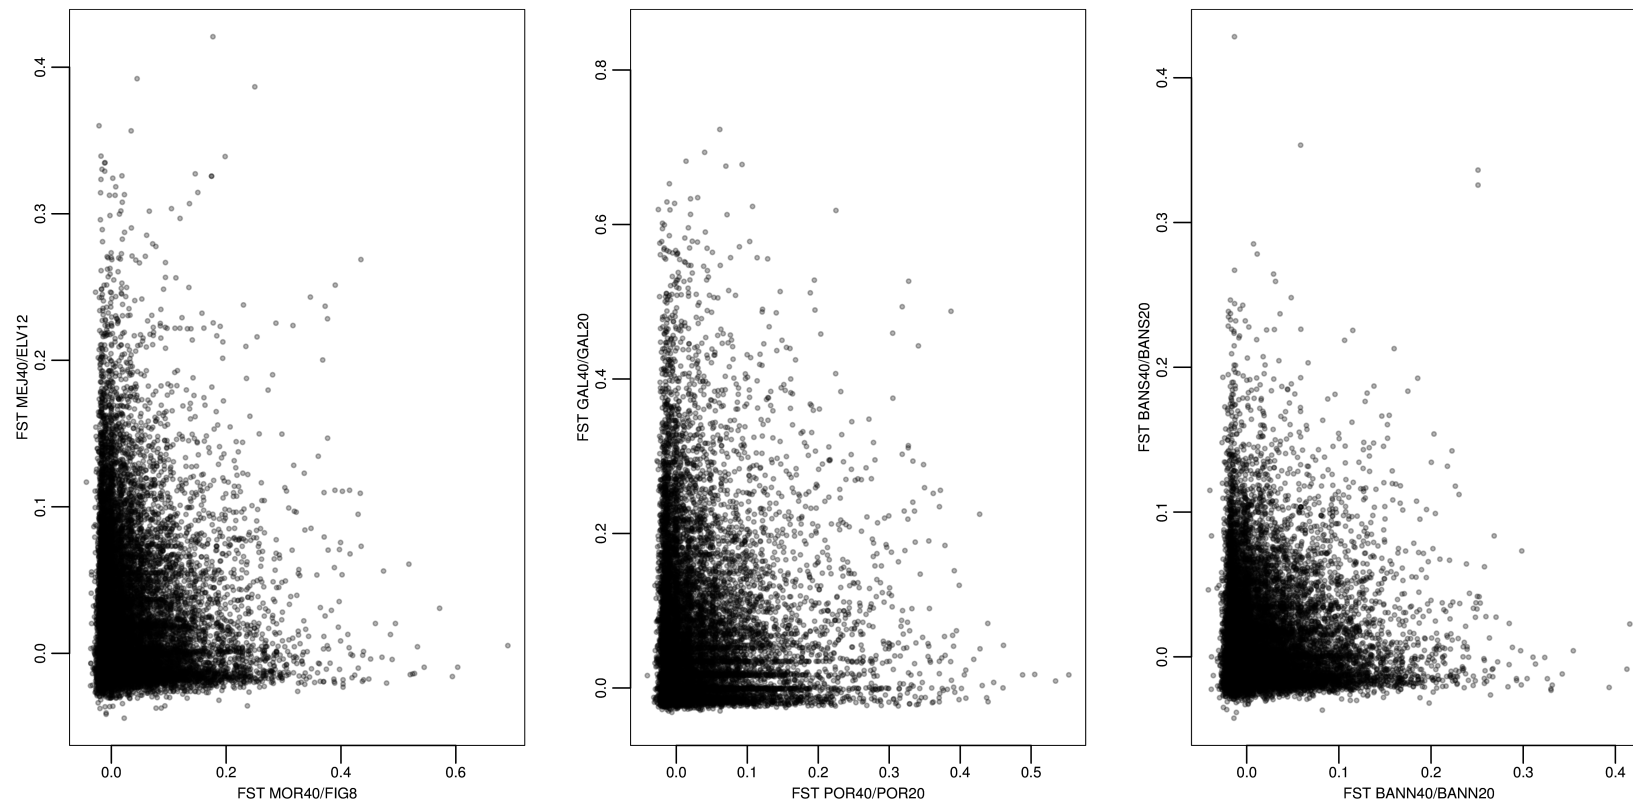

89

620 Table S1. Pairwise  $F_{ST}$  estimates using only putatively neutral SNPs. All comparisons were  
 621 highly significant. Intra-region comparisons are highlighted.

622

|        | BANN20 | BANN40 | BANS20 | BANS40 | ELV12 | MEJ40 | FIG8 | MOR40 | GAL20 | GAL40 | POR20 | POR40 |
|--------|--------|--------|--------|--------|-------|-------|------|-------|-------|-------|-------|-------|
| BANN20 | -      |        |        |        |       |       |      |       |       |       |       |       |
| BANN40 | 0.02   | -      |        |        |       |       |      |       |       |       |       |       |
| BANS20 | 0.02   | 0.01   | -      |        |       |       |      |       |       |       |       |       |
| BANS40 | 0.02   | 0.01   | 0.01   | -      |       |       |      |       |       |       |       |       |
| ELV12  | 0.13   | 0.12   | 0.12   | 0.12   | -     |       |      |       |       |       |       |       |
| MEJ40  | 0.11   | 0.10   | 0.10   | 0.10   | 0.03  | -     |      |       |       |       |       |       |
| FIG8   | 0.13   | 0.12   | 0.12   | 0.12   | 0.09  | 0.07  | -    |       |       |       |       |       |
| MOR40  | 0.10   | 0.10   | 0.09   | 0.09   | 0.07  | 0.05  | 0.04 | -     |       |       |       |       |
| GAL20  | 0.17   | 0.16   | 0.16   | 0.16   | 0.23  | 0.21  | 0.22 | 0.20  | -     |       |       |       |
| GAL40  | 0.11   | 0.09   | 0.09   | 0.09   | 0.18  | 0.16  | 0.18 | 0.15  | 0.10  | -     |       |       |
| POR20  | 0.13   | 0.12   | 0.12   | 0.12   | 0.17  | 0.15  | 0.16 | 0.14  | 0.17  | 0.11  | -     |       |
| POR40  | 0.13   | 0.12   | 0.12   | 0.12   | 0.16  | 0.15  | 0.16 | 0.14  | 0.18  | 0.12  | 0.04  | -     |

623

624 Table S2. Pairwise  $F_{ST}$  estimates using only outlier SNPs from the ARLEQUIN analysis. All  
 625 comparisons were highly significant. Intra-region comparisons are highlighted.

626

627

|        | BANN20 | BANN40 | BANS20 | BANS40 | ELV12 | MEJ40 | FIG8 | MOR40 | GAL20 | GAL40 | POR20 | POR40 |
|--------|--------|--------|--------|--------|-------|-------|------|-------|-------|-------|-------|-------|
| BANN20 | -      |        |        |        |       |       |      |       |       |       |       |       |
| BANN40 | 0.04   | -      |        |        |       |       |      |       |       |       |       |       |
| BANS20 | 0.06   | 0.03   | -      |        |       |       |      |       |       |       |       |       |
| BANS40 | 0.06   | 0.03   | 0.02   | -      |       |       |      |       |       |       |       |       |
| ELV12  | 0.19   | 0.18   | 0.19   | 0.18   | -     |       |      |       |       |       |       |       |
| MEJ40  | 0.16   | 0.14   | 0.15   | 0.15   | 0.04  | -     |      |       |       |       |       |       |
| FIG8   | 0.19   | 0.17   | 0.18   | 0.18   | 0.23  | 0.19  | -    |       |       |       |       |       |
| MOR40  | 0.14   | 0.12   | 0.13   | 0.13   | 0.19  | 0.14  | 0.08 | -     |       |       |       |       |
| GAL20  | 0.27   | 0.27   | 0.28   | 0.27   | 0.37  | 0.35  | 0.36 | 0.32  | -     |       |       |       |
| GAL40  | 0.15   | 0.13   | 0.15   | 0.13   | 0.26  | 0.24  | 0.26 | 0.22  | 0.17  | -     |       |       |
| POR20  | 0.23   | 0.21   | 0.21   | 0.21   | 0.26  | 0.22  | 0.22 | 0.18  | 0.41  | 0.30  | -     |       |
| POR40  | 0.24   | 0.23   | 0.24   | 0.23   | 0.26  | 0.23  | 0.23 | 0.19  | 0.42  | 0.31  | 0.07  | -     |

628

629

91

630

631 Table S3. Results of the annotation analysis of candidates for local adaptation in the three  
632 geographical regions.

633

|              | evaluate | Description                                                 |  | GO                                                                                                                                                           | Region    |
|--------------|----------|-------------------------------------------------------------|--|--------------------------------------------------------------------------------------------------------------------------------------------------------------|-----------|
| Contig_16793 | 1.1E-117 | LON peptidase N-terminal domain and RING finger partial     |  | ubiquitin-protein transferase activity<br>zinc ion binding<br>metal ion binding<br>proteolysis<br>ATP-dependent peptidase activity<br>protein ubiquitination | Marseille |
| Contig_20016 | 0        | Chromodomain-helicase-DNA-binding 1-like                    |  |                                                                                                                                                              |           |
| Contig_23068 | 2.8E-117 | RNA-directed DNA polymerase from mobile element jockey-like |  | nucleic acid phosphodiester bond hydrolysis<br>RNA-directed DNA polymerase activity<br>endonuclease activity<br>RNA-dependent DNA biosynthetic process       |           |
| Contig_38936 | 4.1E-23  | E3 ubiquitin-ligase DZIP                                    |  | nucleic acid binding<br>zinc ion binding                                                                                                                     |           |
| Contig_44372 | 3.1E-61  | PREDICTED : uncharacterized protein<br>LOC107346707         |  | binding                                                                                                                                                      |           |
| Contig_47492 | 7.8E-98  | No description                                              |  | metal ion binding<br>oxidoreductase activity<br>metabolic process<br>oxidation-reduction process                                                             |           |
| Contig_7346  | 2.3E-150 | FAM46C-like                                                 |  |                                                                                                                                                              | Corsica   |
| Contig_10570 | 4.8E-37  | PREDICTED : uncharacterized protein                         |  |                                                                                                                                                              |           |
| Contig_10731 | 2.8E-68  | allene oxide synthase-lipoxygenase                          |  | oxidoreductase activity, acting on single donors with incorporation of molecular oxygen, incorporation of two atoms of oxygen                                |           |

|              |          |                                                 |  |                                                                                                                                                                                                                                                                                                               |
|--------------|----------|-------------------------------------------------|--|---------------------------------------------------------------------------------------------------------------------------------------------------------------------------------------------------------------------------------------------------------------------------------------------------------------|
|              |          |                                                 |  | metal ion binding<br>fatty acid metabolic process                                                                                                                                                                                                                                                             |
| Contig_11268 | 2.3E-90  | neuronal acetylcholine receptor subunit alpha-9 |  | integral component of membrane<br>plasma membrane part<br>extracellular ligand-gated ion channel<br>activity<br>ion transport<br>synaptic transmission<br>response to stimulus<br>biological regulation                                                                                                       |
| Contig_11731 | 0        | E3 ubiquitin-ligase RNF213                      |  | binding                                                                                                                                                                                                                                                                                                       |
| Contig_12920 | 5.5E-149 | Stonin-2 isoform X2                             |  | cytoplasmic part<br>vesicle-mediated transport<br>single-organism process<br>intracellular transport                                                                                                                                                                                                          |
| Contig_13771 | 4.0E-151 | A-kinase anchor mitochondrial                   |  | hemopoiesis<br>cell differentiation                                                                                                                                                                                                                                                                           |
| Contig_16202 | 6.5E-65  | PIN2 TERF1-interacting telomerase inhibitor 1   |  | Nucleus<br>chromosome<br>intracellular organelle part<br>nucleic acid binding<br>regulation of cellular process                                                                                                                                                                                               |
| Contig_16843 | 0        | Succinate-semialdehyde mitochondrial            |  | aldehyde dehydrogenase (NAD) activity<br>succinate-semialdehyde dehydrogenase<br>(NAD <sup>+</sup> ) activity<br>succinate-semialdehyde dehydrogenase<br>[NAD(P) <sup>+</sup> ] activity<br>glycosylceramide metabolic process<br>multicellular organism development<br>glutamine family amino acid metabolic |



|              |          |                                                                |  |                                                                                                                                     |
|--------------|----------|----------------------------------------------------------------|--|-------------------------------------------------------------------------------------------------------------------------------------|
|              |          |                                                                |  | process<br>gamma-aminobutyric acid catabolic<br>process<br>dicarboxylic acid metabolic process<br>oxidation-reduction process       |
| Contig_16868 | 4.3E-24  | glioma tumor suppressor candidate region gene 1-like           |  | Membrane<br>integral component of membrane                                                                                          |
| Contig_17255 | 7.0E-53  | Nanos 1                                                        |  | zinc ion binding<br>RNA binding                                                                                                     |
| Contig_18282 | 1.3E-44  | centromere K                                                   |  | nucleus                                                                                                                             |
| Contig_19099 | 0        | epithelial growth factor receptor substrate 15-like<br>partial |  | Calcium ion binding                                                                                                                 |
| Contig_19611 | 2.0E-134 | DDB1- and CUL4-associated factor 5                             |  | mitochondrion<br>Cul4-RING E3 ubiquitin ligase complex                                                                              |
| Contig_24102 | 1.6E-62  | nuclease HARBI1                                                |  |                                                                                                                                     |
| Contig_24221 | 0        | tRNA (guanine(26)-N(2))-diethyltransferase                     |  | nucleus<br>mitochondrion<br>tRNA (guanine-N2-)-methyltransferase<br>activity<br>binding<br>tRNA N2-guanine methylation              |
| Contig_31623 | 0        | No description                                                 |  | binding                                                                                                                             |
| Contig_32690 | 1.4E-163 | ubiquitin carboxyl-terminal hydrolase isozyme L5               |  | nucleus<br>cytoplasm<br>thiol-dependent ubiquitin-specific<br>protease activity<br>binding<br>ubiquitin-dependent protein catabolic |

|              |          |                                         |  |                                                                                                                                                                                                                         |
|--------------|----------|-----------------------------------------|--|-------------------------------------------------------------------------------------------------------------------------------------------------------------------------------------------------------------------------|
|              |          |                                         |  | process<br>protein deubiquitination<br>regulation of proteolysis<br>forebrain development<br>regulation of cellular protein metabolic<br>process                                                                        |
| Contig_33144 | 6.6E-56  | Dok-7                                   |  | protein kinase binding<br>positive regulation of protein tyrosine<br>kinase activity<br>insulin receptor binding                                                                                                        |
| Contig_35407 | 3.8E-11  | hypothetical protein AC249_AIPGENE14243 |  |                                                                                                                                                                                                                         |
| Contig_36059 | 5.9E-47  | cytosolic non-specific dipeptidase      |  | exopeptidase activity<br>metabolic process                                                                                                                                                                              |
| Contig_36102 | 2.8E-135 | nucleolar complex 4 homolog             |  | Nuclear part                                                                                                                                                                                                            |
| Contig_37478 | 8.9E-28  | fibroblast growth factor receptor 3     |  | membrane<br>cell part<br>protein kinase activity<br>phosphorylation<br>positive regulation of phosphorylation<br>regulation of primary metabolic process                                                                |
| Contig_38721 | 2.3E-41  | L-seryl-tRNA(Sec) kinase                |  | phosphorylation<br>kinase activity                                                                                                                                                                                      |
| Contig_38739 | 2.0E-56  | Dr1                                     |  | Ada2/Gcn5/Ada3 transcription activator<br>complex<br>DNA binding<br>transcription corepressor activity<br>TBP-class protein binding<br>protein heterodimerization activity<br>negative regulation of transcription from |

|              |          |                                                             |  |                                                                                                                                                                                |
|--------------|----------|-------------------------------------------------------------|--|--------------------------------------------------------------------------------------------------------------------------------------------------------------------------------|
|              |          |                                                             |  | RNA polymerase II promoter transcription, DNA-templated<br>histone H3 acetylation                                                                                              |
| Contig_39033 | 7.1E-155 | homeodomain transcription factor 1 isoform X1               |  | intracellular membrane-bounded organelle                                                                                                                                       |
| Contig_40626 | 1.0E-51  | RNA-directed DNA polymerase from mobile element jockey-like |  | nucleic acid phosphodiester bond hydrolysis<br>RNA-directed DNA polymerase activity<br>RNA binding<br>endonuclease activity<br>RNA-dependent DNA biosynthetic process          |
| Contig_41259 | 9.9E-45  | serine protease 23-like                                     |  | proteolysis<br>serine-type endopeptidase activity<br>serine-type peptidase activity<br>peptidase activity                                                                      |
| Contig_41360 | 8.9E-134 | tonsoku                                                     |  | nuclear lumen<br>protein complex<br>DNA metabolic process<br>cellular response to DNA damage stimulus<br>single-organism metabolic process<br>single-organism cellular process |
| Contig_41417 | 3.3E-27  | eukaryotic translation initiator factor 4E-binding 1        |  | cytosol<br>eukaryotic initiation factor 4E binding<br>translational initiation<br>signal transduction<br>negative regulation of translational initiation                       |
| Contig_41500 | 1.8E-128 | Cytoplasmic 1-like                                          |  | cytoskeleton                                                                                                                                                                   |

|              |         |                           |   |                                                                                                                                                                                                                                                                                                                                                                                                                                                                                                                                                   |
|--------------|---------|---------------------------|---|---------------------------------------------------------------------------------------------------------------------------------------------------------------------------------------------------------------------------------------------------------------------------------------------------------------------------------------------------------------------------------------------------------------------------------------------------------------------------------------------------------------------------------------------------|
|              |         |                           |   | plasma membrane<br>focal adhesion<br>dense body                                                                                                                                                                                                                                                                                                                                                                                                                                                                                                   |
| Contig_42135 | 0       | No description            |   | membrane<br>exopeptidase activity                                                                                                                                                                                                                                                                                                                                                                                                                                                                                                                 |
| Contig_42435 | 3.8E-84 | Tensin-partial            | 3 | focal adhesion<br>actin binding<br>cell-substrate junction assembly<br>fibroblast migration                                                                                                                                                                                                                                                                                                                                                                                                                                                       |
| Contig_43083 | 2.0E-47 | No description            |   |                                                                                                                                                                                                                                                                                                                                                                                                                                                                                                                                                   |
| Contig_45623 | 0       | kinesin KIF16B isoform X2 |   | early endosome<br>cytosol<br>kinesin complex<br>phosphatidylinositol-3,4,5-trisphosphate<br>binding<br>ATP-dependent microtubule motor<br>activity, plus-end-directed<br>phosphatidylinositol-3-phosphate<br>binding<br>phosphatidylinositol-3,4-bisphosphate<br>binding<br>phosphatidylinositol-3,5-bisphosphate<br>binding<br>formation of primary germ layer<br>regulation of receptor recycling<br>Golgi to endosome transport<br>microtubule-based movement<br>epidermal growth factor receptor<br>signaling pathway<br>endoderm development |

|              |          |                                    |  |                                                                                                                                                                                        |
|--------------|----------|------------------------------------|--|----------------------------------------------------------------------------------------------------------------------------------------------------------------------------------------|
|              |          |                                    |  | fibroblast growth factor receptor signaling pathway<br>cytoskeleton-dependent intracellular transport<br>receptor catabolic process<br>early endosome to late endosome transport       |
| Contig_45771 | 8.3E-94  | No description                     |  | membrane<br>dopamine neurotransmitter receptor activity<br>G-protein coupled receptor signaling pathway                                                                                |
| Contig_47280 | 2.0E-168 | No description                     |  | regulation of Rho protein signal transduction<br>metabolic process<br>Rho guanyl-nucleotide exchange factor activity<br>transferase activity<br>positive regulation of GTPase activity |
| Contig_47344 | 0        | allene oxide synthase-lipoxygenase |  | oxidoreductase activity, acting on single donors with incorporation of molecular oxygen, incorporation of two atoms of oxygen<br>metal ion binding<br>fatty acid metabolic process     |
| Contig_5993  | 1.5E-95  | GA-binding subunit beta-partial    |  | nucleus<br>protein homodimerization activity<br>transcription regulatory region DNA binding<br>protein heterodimerization activity                                                     |

|              |          |                                    |   |                                                                                                                                                                     |         |
|--------------|----------|------------------------------------|---|---------------------------------------------------------------------------------------------------------------------------------------------------------------------|---------|
|              |          |                                    |   | transcription, DNA-templated<br>positive regulation of transcription from<br>RNA polymerase II promoter                                                             |         |
| Contig_7742  | 0        | Indole-3-acetaldehyde oxidase-like |   | oxidoreductase activity<br>ion binding<br>single-organism metabolic process                                                                                         |         |
| Contig_8936  | 5.2E-105 | drebrin isoform X1                 |   | actin filament binding<br>synapse assembly<br>ruffle assembly<br>actin binding<br>neuron projection morphogenesis<br>receptor-mediated endocytosis<br>intracellular |         |
| Contig_8963  | 3.4E-169 | tubuline delta chain               |   | Intracellular part                                                                                                                                                  |         |
| Contig_26377 | 6.7E-138 | ribokinase isoform X1              | 2 | ribokinase activity<br>D-ribose metabolic process<br>carbohydrate phosphorylation                                                                                   | Banyuls |
